# Supplementary material for: Relationship between gene expression patterns from nasopharyngeal swabs and serum biomarkers in patients hospitalized with COVID-19, following treatment with the neutralizing monoclonal antibody bamlanivimab
Source: J Transl Med. 2022 Mar 18;20:134. doi: 10.1186/s12967-022-03345-3 (PMC8931785; doi:10.1186/s12967-022-03345-3)
Supplement: Supplementary file 2 — Additional file 2. Listing of inflammation-related and COVID-19 implicated genes in custom Ion AmpliSeq RNA panel. [file 12967_2022_3345_MOESM2_ESM.xlsx]

## Sheet: IAD199521_4
Name	Gene_Symbol	Accession	Pool	Chromosome	Strand	Expression filtering
A2M	A2M	NM_000014.4	Pool1	chr12	-	Retained
AAK1	AAK1	NM_014911.3	Pool1	chr2	-	Retained
ABCB1	ABCB1	NM_000927.4	Pool1	chr7	-	Retained
ABCF1	ABCF1	NM_001025091.1	Pool1	chr6	+	Retained
ABCF1	ABCF1	NM_001090.2	Pool1	chr6	+	Retained
ACE2	ACE2	NM_021804.2	Pool1	chrX	-	Retained
ADCY3	ADCY3	NM_004036.3	Pool1	chr2	-	Retained
ADIPOQ	ADIPOQ	NM_001177800.1	Pool1	chr3	+	Filtered out
ADIPOQ	ADIPOQ	NM_004797.3	Pool1	chr3	+	Filtered out
ADORA2A	ADORA2A	NM_000675.4	Pool1	chr22	+	Retained
ADRB1	ADRB1	NM_000684.2	Pool1	chr10	+	Retained
ADRB2	ADRB2	NM_000024.5	Pool1	chr5	+	Retained
AFAP1L2	AFAP1L2	NM_001001936.1	Pool1	chr10	-	Retained
AFAP1L2	AFAP1L2	NM_032550.2	Pool1	chr10	-	Retained
AGER	AGER	NM_001136.4	Pool1	chr6	-	Retained
AGER	AGER	NM_001206929.1	Pool1	chr6	-	Retained
AGER	AGER	NM_001206932.1	Pool1	chr6	-	Retained
AGER	AGER	NM_001206934.1	Pool1	chr6	-	Retained
AGER	AGER	NM_001206936.1	Pool1	chr6	-	Retained
AGER	AGER	NM_001206940.1	Pool1	chr6	-	Retained
AGER	AGER	NM_001206954.1	Pool1	chr6	-	Retained
AGER	AGER	NM_001206966.1	Pool1	chr6	-	Retained
AGER	AGER	NM_172197.2	Pool1	chr6	-	Retained
AGER	AGER	NR_038190.1	Pool1	chr6	-	Retained
AGT	AGT	NM_000029.3	Pool1	chr1	-	Retained
AGTR1	AGTR1	NM_004835.4	Pool1	chr3	+	Filtered out
AGTR1	AGTR1	NM_031850.3	Pool1	chr3	+	Filtered out
AGTR1	AGTR1	NM_032049.3	Pool1	chr3	+	Filtered out
AHSG	AHSG	NM_001622.2	Pool1	chr3	+	Filtered out
AIF1	AIF1	NM_001623.3	Pool1	chr6	+	Retained
AIF1	AIF1	NM_004847.3	Pool1	chr6	+	Retained
AIF1	AIF1	NM_032955.1	Pool1	chr6	+	Retained
AIMP1	AIMP1	NM_001142415.1	Pool1	chr4	+	Retained
AIMP1	AIMP1	NM_001142416.1	Pool1	chr4	+	Retained
AIMP1	AIMP1	NM_004757.3	Pool1	chr4	+	Retained
AKT1	AKT1	NM_001014431.1	Pool1	chr14	-	Retained
AKT1	AKT1	NM_001014432.1	Pool1	chr14	-	Retained
AKT1	AKT1	NM_005163.2	Pool1	chr14	-	Retained
ALOX15	ALOX15	NM_001140.3	Pool1	chr17	-	Retained
ALOX5	ALOX5	NM_000698.3	Pool1	chr10	+	Retained
ALOX5	ALOX5	NM_001256153.1	Pool1	chr10	+	Retained
ALOX5	ALOX5	NM_001256154.1	Pool1	chr10	+	Retained
ALOX5AP	ALOX5AP	NM_001204406.1	Pool1	chr13	+	Retained
ALOX5AP	ALOX5AP	NM_001629.3	Pool1	chr13	+	Retained
ANGPT1	ANGPT1	NM_001146.3	Pool1	chr8	-	Retained
ANGPT1	ANGPT1	NM_001199859.1	Pool1	chr8	-	Retained
ANGPT2	ANGPT2	NM_001118887.1	Pool1	chr8	-	Retained
ANGPT2	ANGPT2	NM_001118888.1	Pool1	chr8	-	Retained
ANGPT2	ANGPT2	NM_001147.2	Pool1	chr8	-	Retained
ANXA1	ANXA1	NM_000700.1	Pool1	chr9	+	Retained
ANXA3	ANXA3	NM_005139.2	Pool1	chr4	+	Retained
AOAH	AOAH	NM_001177506.1	Pool1	chr7	-	Retained
AOAH	AOAH	NM_001177507.1	Pool1	chr7	-	Retained
AOAH	AOAH	NM_001637.3	Pool1	chr7	-	Retained
AOC3	AOC3	NM_003734.2	Pool1	chr17	+	Retained
APCS	APCS	NM_001639.3	Pool1	chr1	+	Filtered out
APOA1	APOA1	NM_000039.1	Pool1	chr11	-	Retained
APOA4	APOA4	NM_000482.3	Pool1	chr11	-	Filtered out
APOE	APOE	NM_000041.2	Pool1	chr19	+	Retained
APOL2	APOL2	NM_030882.2	Pool1	chr22	-	Retained
APOL2	APOL2	NM_145637.1	Pool1	chr22	-	Retained
AQP3	AQP3	NM_004925.4	Pool1	chr9	-	Retained
AREG	AREG	NM_001657.2	Pool1	chr4	+	Retained
ARX	ARX	NM_139058.2	Pool1	chrX	-	Retained
ASCL3	ASCL3	NM_020646.1	Pool1	chr11	-	Retained
ATF2	ATF2	NM_001256090.1	Pool1	chr2	-	Retained
ATF2	ATF2	NM_001256091.1	Pool1	chr2	-	Retained
ATF2	ATF2	NM_001256092.1	Pool1	chr2	-	Retained
ATF2	ATF2	NM_001256093.1	Pool1	chr2	-	Retained
ATF2	ATF2	NM_001256094.1	Pool1	chr2	-	Retained
ATF2	ATF2	NM_001880.3	Pool1	chr2	-	Retained
ATF2	ATF2	NR_045768.1	Pool1	chr2	-	Retained
ATF2	ATF2	NR_045769.1	Pool1	chr2	-	Retained
ATF2	ATF2	NR_045770.1	Pool1	chr2	-	Retained
ATF2	ATF2	NR_045771.1	Pool1	chr2	-	Retained
ATF2	ATF2	NR_045772.1	Pool1	chr2	-	Retained
ATF2	ATF2	NR_045773.1	Pool1	chr2	-	Retained
ATF2	ATF2	NR_045774.1	Pool1	chr2	-	Retained
ATRN	ATRN	NM_001207047.1	Pool1	chr20	+	Retained
ATRN	ATRN	NM_139321.2	Pool1	chr20	+	Retained
ATRN	ATRN	NM_139322.2	Pool1	chr20	+	Retained
AXL	AXL	NM_001699.4	Pool1	chr19	+	Retained
AXL	AXL	NM_021913.3	Pool1	chr19	+	Retained
AZGP1	AZGP1	NM_001185.3	Pool1	chr7	-	Retained
AZU1	AZU1	NM_001700.3	Pool1	chr19	+	Retained
B4GALT1	B4GALT1	NM_001497.3	Pool1	chr9	-	Retained
BAD	BAD	NM_004322.3	Pool1	chr11	-	Retained
BAD	BAD	NM_032989.2	Pool1	chr11	-	Retained
BARX2	BARX2	NM_003658.4	Pool1	chr11	+	Retained
BCAN	BCAN	NM_021948.4	Pool1	chr1	+	Filtered out
BCAN	BCAN	NM_198427.1	Pool1	chr1	+	Filtered out
BCL10	BCL10	NM_003921.4	Pool1	chr1	-	Retained
BCL2	BCL2	NM_000633.2	Pool1	chr18	-	Retained
BCL2	BCL2	NM_000657.2	Pool1	chr18	-	Retained
BCL2A1	BCL2A1	NM_001114735.1	Pool1	chr15	-	Retained
BCL2A1	BCL2A1	NM_004049.3	Pool1	chr15	-	Retained
BCL2L1	BCL2L1	NM_001191.2	Pool1	chr20	-	Retained
BCL2L1	BCL2L1	NM_138578.1	Pool1	chr20	-	Retained
BCL6	BCL6	NM_001130845.1	Pool1	chr3	-	Retained
BCL6	BCL6	NM_001134738.1	Pool1	chr3	-	Retained
BCL6	BCL6	NM_001706.4	Pool1	chr3	-	Retained
BDKRB1	BDKRB1	NM_000710.3	Pool1	chr14	+	Retained
BDKRB2	BDKRB2	NM_000623.3	Pool1	chr14	+	Retained
BIKe	BMP2K	NM_017593.3	Pool1	chr4	+	Retained
BIKe	BMP2K	NM_198892.1	Pool1	chr4	+	Retained
BIRC5	BIRC5	NM_001012270.1	Pool1	chr17	+	Retained
BIRC5	BIRC5	NM_001012271.1	Pool1	chr17	+	Retained
BIRC5	BIRC5	NM_001168.2	Pool1	chr17	+	Retained
BLNK	BLNK	NM_001114094.1	Pool1	chr10	-	Retained
BLNK	BLNK	NM_001258440.1	Pool1	chr10	-	Retained
BLNK	BLNK	NM_001258441.1	Pool1	chr10	-	Retained
BLNK	BLNK	NM_001258442.1	Pool1	chr10	-	Retained
BLNK	BLNK	NM_013314.3	Pool1	chr10	-	Retained
BLNK	BLNK	NR_047680.1	Pool1	chr10	-	Retained
BLNK	BLNK	NR_047681.1	Pool1	chr10	-	Retained
BLNK	BLNK	NR_047682.1	Pool1	chr10	-	Retained
BLNK	BLNK	NR_047683.1	Pool1	chr10	-	Retained
BMP1	BMP1	NM_001199.3	Pool1	chr8	+	Retained
BMP1	BMP1	NM_006129.4	Pool1	chr8	+	Retained
BMP1	BMP1	NR_033403.1	Pool1	chr8	+	Retained
BMP1	BMP1	NR_033404.1	Pool1	chr8	+	Retained
BMP10	BMP10	NM_014482.1	Pool1	chr2	-	Filtered out
BMP15	BMP15	NM_005448.2	Pool1	chrX	+	Filtered out
BMP2	BMP2	NM_001200.2	Pool1	chr20	+	Retained
BMP3	BMP3	NM_001201.2	Pool1	chr4	+	Retained
BMP4	BMP4	NM_001202.3	Pool1	chr14	-	Retained
BMP4	BMP4	NM_130850.2	Pool1	chr14	-	Retained
BMP4	BMP4	NM_130851.2	Pool1	chr14	-	Retained
BMP5	BMP5	NM_021073.2	Pool1	chr6	-	Retained
BMP6	BMP6	NM_001718.4	Pool1	chr6	+	Retained
BMP7	BMP7	NM_001719.2	Pool1	chr20	-	Retained
BMP8A	BMP8A	NM_181809.3	Pool1	chr1	+	Retained
BMP8B	BMP8B	NM_001720.3	Pool1	chr1	-	Filtered out
BMPR1B	BMPR1B	NM_001203.2	Pool1	chr4	+	Retained
BMPR1B	BMPR1B	NM_001256792.1	Pool1	chr4	+	Retained
BMPR1B	BMPR1B	NM_001256793.1	Pool1	chr4	+	Retained
BMPR1B	BMPR1B	NM_001256794.1	Pool1	chr4	+	Retained
BPIFA1	BPIFA1	NM_001243193.1	Pool1	chr20	+	Retained
BPIFA1	BPIFA1	NM_016583.3	Pool1	chr20	+	Retained
BPIFA1	BPIFA1	NM_130852.2	Pool1	chr20	+	Retained
BPIFB1	BPIFB1	NM_033197.2	Pool1	chr20	+	Retained
BPIFB4	BPIFB4	NM_182519.2	Pool1	chr20	+	Retained
BRE	BRE	NM_001261840.1	Pool1	chr2	+	Retained
BRE	BRE	NM_004899.4	Pool1	chr2	+	Retained
BRE	BRE	NM_199191.2	Pool1	chr2	+	Retained
BRE	BRE	NM_199192.2	Pool1	chr2	+	Retained
BRE	BRE	NM_199193.2	Pool1	chr2	+	Retained
BRE	BRE	NM_199194.2	Pool1	chr2	+	Retained
BTK	BTK	NM_000061.2	Pool1	chrX	-	Retained
C16orf5	C16orf5	NM_001199054.1	Pool1	chr16	-	Retained
C16orf5	C16orf5	NM_001199055.1	Pool1	chr16	-	Retained
C16orf5	C16orf5	NM_001199056.1	Pool1	chr16	-	Retained
C16orf5	C16orf5	NM_013399.2	Pool1	chr16	-	Retained
C1QA	C1QA	NM_015991.2	Pool1	chr1	+	Retained
C1QB	C1QB	NM_000491.3	Pool1	chr1	+	Retained
C1QC	C1QC	NM_001114101.1	Pool1	chr1	+	Retained
C1QC	C1QC	NM_172369.3	Pool1	chr1	+	Retained
C1R	C1R	NM_001733.4	Pool1	chr12	-	Retained
C1S	C1S	NM_001734.3	Pool1	chr12	+	Retained
C1S	C1S	NM_201442.2	Pool1	chr12	+	Retained
C3	C3	NM_000064.2	Pool1	chr19	-	Retained
C3AR1	C3AR1	NM_004054.2	Pool1	chr12	-	Retained
C4BPA	C4BPA	NM_000715.3	Pool1	chr1	+	Retained
C4BPB	C4BPB	NM_000716.3	Pool1	chr1	+	Retained
C4BPB	C4BPB	NM_001017364.1	Pool1	chr1	+	Retained
C4BPB	C4BPB	NM_001017365.1	Pool1	chr1	+	Retained
C4BPB	C4BPB	NM_001017366.1	Pool1	chr1	+	Retained
C4BPB	C4BPB	NM_001017367.1	Pool1	chr1	+	Retained
C5	C5	NM_001735.2	Pool1	chr9	-	Retained
C6	C6	NM_000065.2	Pool1	chr5	-	Retained
C6	C6	NM_001115131.1	Pool1	chr5	-	Retained
C7	C7	NM_000587.2	Pool1	chr5	+	Filtered out
C8A	C8A	NM_000562.2	Pool1	chr1	+	Filtered out
C8B	C8B	NM_000066.2	Pool1	chr1	-	Retained
C8G	C8G	NM_000606.2	Pool1	chr9	+	Retained
C9	C9	NM_001737.3	Pool1	chr5	-	Filtered out
CACNA2D1	CACNA2D1	NM_000722.2	Pool1	chr7	-	Retained
CACNB2	CACNB2	NM_000724.3	Pool1	chr10	+	Retained
CACNB2	CACNB2	NM_001167945.1	Pool1	chr10	+	Retained
CACNB2	CACNB2	NM_201570.2	Pool1	chr10	+	Retained
CACNB2	CACNB2	NM_201571.3	Pool1	chr10	+	Retained
CACNB2	CACNB2	NM_201572.3	Pool1	chr10	+	Retained
CACNB2	CACNB2	NM_201590.2	Pool1	chr10	+	Retained
CACNB2	CACNB2	NM_201593.2	Pool1	chr10	+	Retained
CACNB2	CACNB2	NM_201596.2	Pool1	chr10	+	Retained
CACNB2	CACNB2	NM_201597.2	Pool1	chr10	+	Retained
CACNB4	CACNB4	NM_000726.3	Pool1	chr2	-	Retained
CACNB4	CACNB4	NM_001005746.2	Pool1	chr2	-	Retained
CACNB4	CACNB4	NM_001005747.2	Pool1	chr2	-	Retained
CACNB4	CACNB4	NM_001145798.1	Pool1	chr2	-	Retained
CALCA	CALCA	NM_001033952.2	Pool1	chr11	-	Filtered out
CALCA	CALCA	NM_001033953.2	Pool1	chr11	-	Filtered out
CALCA	CALCA	NM_001741.2	Pool1	chr11	-	Filtered out
CAMP	CAMP	NM_004345.4	Pool1	chr3	+	Retained
CAPS	CAPS	NM_004058.3	Pool1	chr19	+	Retained
CAPS	CAPS	NM_080590.2	Pool1	chr19	+	Retained
CASC3	CASC3	NM_007359.4	Pool1	chr17	+	Retained
CASP1	CASP1	NM_001223.4	Pool1	chr11	-	Retained
CASP1	CASP1	NM_001257118.1	Pool1	chr11	-	Retained
CASP1	CASP1	NM_001257119.1	Pool1	chr11	-	Retained
CASP1	CASP1	NM_033292.3	Pool1	chr11	-	Retained
CASP1	CASP1	NM_033293.3	Pool1	chr11	-	Retained
CASP1	CASP1	NM_033294.3	Pool1	chr11	-	Retained
CASP1	CASP1	NM_033295.3	Pool1	chr11	-	Retained
CBL	CBL	NM_005188.3	Pool1	chr11	+	Retained
CCBP2	CCBP2	NM_001296.4	Pool1	chr3	+	Retained
CCK	CCK	NM_000729.4	Pool1	chr3	-	Filtered out
CCK	CCK	NM_001174138.1	Pool1	chr3	-	Filtered out
CCL1	CCL1	NM_002981.1	Pool1	chr17	-	Filtered out
CCL11	CCL11	NM_002986.2	Pool1	chr17	+	Filtered out
CCL13	CCL13	NM_005408.2	Pool1	chr17	+	Filtered out
CCL16	CCL16	NM_004590.2	Pool1	chr17	-	Filtered out
CCL17	CCL17	NM_002987.2	Pool1	chr16	+	Retained
CCL18	CCL18	NM_002988.2	Pool1	chr17	+	Retained
CCL19	CCL19	NM_006274.2	Pool1	chr9	-	Retained
CCL20	CCL20	NM_001130046.1	Pool1	chr2	+	Retained
CCL20	CCL20	NM_004591.2	Pool1	chr2	+	Retained
CCL21	CCL21	NM_002989.2	Pool1	chr9	-	Retained
CCL22	CCL22	NM_002990.4	Pool1	chr16	+	Retained
CCL24	CCL24	NM_002991.2	Pool1	chr7	-	Retained
CCL25	CCL25	NM_001201359.1	Pool1	chr19	+	Retained
CCL25	CCL25	NM_005624.3	Pool1	chr19	+	Retained
CCL26	CCL26	NM_006072.4	Pool1	chr7	-	Retained
CCL27	CCL27	NM_006664.2	Pool1	chr9	-	Filtered out
CCL28	CCL28	NM_148672.2	Pool1	chr5	-	Retained
CCL3	CCL3	NM_002983.2	Pool1	chr17	-	Retained
CCL4	CCL4	NM_002984.2	Pool1	chr17	+	Retained
CCL5	CCL5	NM_002985.2	Pool1	chr17	-	Retained
CCL7	CCL7	NM_006273.2	Pool1	chr17	+	Retained
CCL8	CCL8	NM_005623.2	Pool1	chr17	+	Retained
CCND1	CCND1	NM_053056.2	Pool1	chr11	+	Retained
CCND2	CCND2	NM_001759.3	Pool1	chr12	+	Retained
CCR1	CCR1	NM_001295.2	Pool1	chr3	-	Retained
CCR2	CCR2	NM_001123041.2	Pool1	chr3	+	Retained
CCR2	CCR2	NM_001123396.1	Pool1	chr3	+	Retained
CCR3	CCR3	NM_001164680.1	Pool1	chr3	+	Filtered out
CCR3	CCR3	NM_178328.1	Pool1	chr3	+	Filtered out
CCR4	CCR4	NM_005508.4	Pool1	chr3	+	Retained
CCR5	CCR5	NM_000579.3	Pool1	chr3	+	Retained
CCR5	CCR5	NM_001100168.1	Pool1	chr3	+	Retained
CCR6	CCR6	NM_004367.5	Pool1	chr6	+	Retained
CCR6	CCR6	NM_031409.3	Pool1	chr6	+	Retained
CCR7	CCR7	NM_001838.3	Pool1	chr17	-	Retained
CCR8	CCR8	NM_005201.3	Pool1	chr3	+	Retained
CCR9	CCR9	NM_001256369.1	Pool1	chr3	+	Filtered out
CCR9	CCR9	NM_031200.2	Pool1	chr3	+	Filtered out
CCRL1	CCRL1	NM_016557.2	Pool1	chr3	+	Retained
CCRL2	CCRL2	NM_003965.4	Pool1	chr3	+	Retained
CD163	CD163	NM_004244.5	Pool1	chr12	-	Retained
CD163	CD163	NM_203416.3	Pool1	chr12	-	Retained
CD180	CD180	NM_005582.2	Pool1	chr5	-	Retained
CD1D	CD1D	NM_001766.3	Pool1	chr1	+	Retained
CD2	CD2	NM_001767.3	Pool1	chr1	+	Retained
CD274	CD274	NM_001267706.1	Pool1	chr9	+	Retained
CD274	CD274	NM_014143.3	Pool1	chr9	+	Retained
CD274	CD274	NR_052005.1	Pool1	chr9	+	Retained
CD28	CD28	NM_001243077.1	Pool1	chr2	+	Retained
CD28	CD28	NM_001243078.1	Pool1	chr2	+	Retained
CD28	CD28	NM_006139.3	Pool1	chr2	+	Retained
CD300E	CD300E	NM_181449.2	Pool1	chr17	-	Retained
CD3G	CD3G	NM_000073.2	Pool1	chr11	+	Retained
CD4	CD4	NM_000616.4	Pool1	chr12	+	Retained
CD4	CD4	NM_001195014.2	Pool1	chr12	+	Retained
CD4	CD4	NM_001195015.2	Pool1	chr12	+	Retained
CD4	CD4	NM_001195016.2	Pool1	chr12	+	Retained
CD4	CD4	NM_001195017.2	Pool1	chr12	+	Retained
CD40	CD40	NM_001250.4	Pool1	chr20	+	Retained
CD40	CD40	NM_152854.2	Pool1	chr20	+	Retained
CD40LG	CD40LG	NM_000074.2	Pool1	chrX	+	Retained
CD44	CD44	NM_000610.3	Pool1	chr11	+	Retained
CD44	CD44	NM_001001389.1	Pool1	chr11	+	Retained
CD44	CD44	NM_001001390.1	Pool1	chr11	+	Retained
CD44	CD44	NM_001001391.1	Pool1	chr11	+	Retained
CD44	CD44	NM_001001392.1	Pool1	chr11	+	Retained
CD44	CD44	NM_001202555.1	Pool1	chr11	+	Retained
CD44	CD44	NM_001202556.1	Pool1	chr11	+	Retained
CD44	CD44	NM_001202557.1	Pool1	chr11	+	Retained
CD46	CD46	NM_002389.4	Pool1	chr1	+	Retained
CD46	CD46	NM_153826.3	Pool1	chr1	+	Retained
CD46	CD46	NM_172350.2	Pool1	chr1	+	Retained
CD46	CD46	NM_172351.2	Pool1	chr1	+	Retained
CD46	CD46	NM_172352.2	Pool1	chr1	+	Retained
CD46	CD46	NM_172353.2	Pool1	chr1	+	Retained
CD46	CD46	NM_172359.2	Pool1	chr1	+	Retained
CD46	CD46	NM_172361.2	Pool1	chr1	+	Retained
CD55	CD55	NM_000574.3	Pool1	chr1	+	Retained
CD55	CD55	NM_001114752.1	Pool1	chr1	+	Retained
CD69	CD69	NM_001781.2	Pool1	chr12	-	Retained
CD74	CD74	NM_001025158.2	Pool1	chr5	-	Retained
CD74	CD74	NM_001025159.2	Pool1	chr5	-	Retained
CD74	CD74	NM_004355.3	Pool1	chr5	-	Retained
CD79A	CD79A	NM_001783.3	Pool1	chr19	+	Retained
CD79A	CD79A	NM_021601.3	Pool1	chr19	+	Retained
CD80	CD80	NM_005191.3	Pool1	chr3	-	Retained
CD86	CD86	NM_001206924.1	Pool1	chr3	+	Retained
CD86	CD86	NM_001206925.1	Pool1	chr3	+	Retained
CD86	CD86	NM_006889.4	Pool1	chr3	+	Retained
CD86	CD86	NM_175862.4	Pool1	chr3	+	Retained
CD97	CD97	NM_001025160.2	Pool1	chr19	+	Retained
CD97	CD97	NM_001784.4	Pool1	chr19	+	Retained
CD97	CD97	NM_078481.3	Pool1	chr19	+	Retained
CDHR1	CDHR1	NM_001171971.1	Pool1	chr10	+	Retained
CDHR1	CDHR1	NM_033100.2	Pool1	chr10	+	Retained
CDHR3	CDHR3	NM_152750.4	Pool1	chr7	+	Retained
CDK5	CDK5	NM_001164410.1	Pool1	chr7	-	Retained
CDK5	CDK5	NM_004935.3	Pool1	chr7	-	Retained
CDK9	CDK9	NM_001261.3	Pool1	chr9	+	Retained
CDKN1A	CDKN1A	NM_000389.4	Pool1	chr6	+	Retained
CDKN1A	CDKN1A	NM_001220777.1	Pool1	chr6	+	Retained
CDKN1A	CDKN1A	NM_001220778.1	Pool1	chr6	+	Retained
CDKN1A	CDKN1A	NM_078467.2	Pool1	chr6	+	Retained
CDKN1B	CDKN1B	NM_004064.3	Pool1	chr12	+	Retained
CDO1	CDO1	NM_001801.2	Pool1	chr5	-	Retained
CEBPA	CEBPA	NM_004364.3	Pool1	chr19	-	Retained
CEBPB	CEBPB	NM_005194.3	Pool1	chr20	+	Retained
CEBPD	CEBPD	NM_005195.3	Pool1	chr8	-	Retained
CER1	CER1	NM_005454.2	Pool1	chr9	-	Filtered out
CFD	CFD	NM_001928.2	Pool1	chr19	+	Retained
CFH	CFH	NM_000186.3	Pool1	chr1	+	Retained
CFH	CFH	NM_001014975.2	Pool1	chr1	+	Retained
CFHR1	CFHR1	NM_002113.2	Pool1	chr1	+	Filtered out
CFHR5	CFHR5	NM_030787.3	Pool1	chr1	+	Filtered out
CFI	CFI	NM_000204.3	Pool1	chr4	-	Retained
CFP	CFP	NM_001145252.1	Pool1	chrX	-	Retained
CFP	CFP	NM_002621.2	Pool1	chrX	-	Retained
CFTR	CFTR	NM_000492.3	Pool1	chr7	+	Retained
CHGA	CHGA	NM_001275.3	Pool1	chr14	+	Retained
CHRNA7	CHRNA7	NM_000746.5	Pool1	chr15	+	Retained
CHRNA7	CHRNA7	NM_001190455.2	Pool1	chr15	+	Retained
CHRNA7	CHRNA7	NR_046324.1	Pool1	chr15	+	Retained
CHST4	CHST4	NM_001166395.1	Pool1	chr16	+	Retained
CHUK	CHUK	NM_001278.3	Pool1	chr10	-	Retained
CISH	CISH	NM_013324.5	Pool1	chr3	-	Retained
CISH	CISH	NM_145071.2	Pool1	chr3	-	Retained
CKLF	CKLF	NM_001040138.2	Pool1	chr16	+	Retained
CKLF	CKLF	NM_016951.3	Pool1	chr16	+	Retained
CKLF	CKLF	NM_181641.2	Pool1	chr16	+	Retained
CLCF1	CLCF1	NM_001166212.1	Pool1	chr11	-	Retained
CLCF1	CLCF1	NM_013246.2	Pool1	chr11	-	Retained
CLDN5	CLDN5	NM_001130861.1	Pool1	chr22	-	Filtered out
CLDN5	CLDN5	NM_003277.3	Pool1	chr22	-	Filtered out
CLU	CLU	NM_001831.3	Pool1	chr8	-	Retained
CLU	CLU	NR_038335.1	Pool1	chr8	-	Retained
CLU	CLU	NR_045494.1	Pool1	chr8	-	Retained
CMKLR1	CMKLR1	NM_001142343.1	Pool1	chr12	-	Retained
CMKLR1	CMKLR1	NM_001142344.1	Pool1	chr12	-	Retained
CMKLR1	CMKLR1	NM_001142345.1	Pool1	chr12	-	Retained
CMTM1	CMTM1	NM_052999.3	Pool1	chr16	+	Retained
CMTM1	CMTM1	NM_181268.2	Pool1	chr16	+	Retained
CMTM1	CMTM1	NM_181269.2	Pool1	chr16	+	Retained
CMTM1	CMTM1	NM_181270.2	Pool1	chr16	+	Retained
CMTM2	CMTM2	NM_001199317.1	Pool1	chr16	+	Retained
CMTM2	CMTM2	NM_144673.2	Pool1	chr16	+	Retained
CMTM3	CMTM3	NM_144601.3	Pool1	chr16	+	Retained
CMTM3	CMTM3	NM_181553.2	Pool1	chr16	+	Retained
CMTM3	CMTM3	NR_037613.1	Pool1	chr16	+	Retained
CMTM3	CMTM3	NR_037619.1	Pool1	chr16	+	Retained
CMTM4	CMTM4	NM_178818.2	Pool1	chr16	-	Retained
CMTM4	CMTM4	NM_181521.2	Pool1	chr16	-	Retained
CMTM5	CMTM5	NM_001037288.1	Pool1	chr14	+	Retained
CMTM5	CMTM5	NM_138460.2	Pool1	chr14	+	Retained
CMTM6	CMTM6	NM_017801.2	Pool1	chr3	-	Retained
CNTFR	CNTFR	NM_001207011.1	Pool1	chr9	-	Retained
CNTFR	CNTFR	NM_001842.4	Pool1	chr9	-	Retained
CNTFR	CNTFR	NM_147164.2	Pool1	chr9	-	Retained
COL1A1	COL1A1	NM_000088.3	Pool1	chr17	-	Retained
COL1A2	COL1A2	NM_000089.3	Pool1	chr7	+	Retained
COL2A1	COL2A1	NM_001844.4	Pool1	chr12	-	Filtered out
COL2A1	COL2A1	NM_033150.2	Pool1	chr12	-	Filtered out
COL3A1	COL3A1	NM_000090.3	Pool1	chr2	+	Retained
CPA3	CPA3	NM_001870.2	Pool1	chr3	+	Retained
CR1	CR1	NM_000573.3	Pool1	chr1	+	Retained
CR1	CR1	NM_000651.4	Pool1	chr1	+	Retained
CR2	CR2	NM_001006658.2	Pool1	chr1	+	Retained
CR2	CR2	NM_001877.4	Pool1	chr1	+	Retained
CRABP1	CRABP1	NM_004378.2	Pool1	chr15	+	Retained
CREBBP	CREBBP	NM_001079846.1	Pool1	chr16	-	Retained
CREBBP	CREBBP	NM_004380.2	Pool1	chr16	-	Retained
CRKL	CRKL	NM_005207.3	Pool1	chr22	+	Retained
CRLF1	CRLF1	NM_004750.4	Pool1	chr19	-	Retained
CRP	CRP	NM_000567.2	Pool1	chr1	-	Filtered out
CSF1	CSF1	NM_000757.5	Pool1	chr1	+	Retained
CSF1	CSF1	NM_172210.2	Pool1	chr1	+	Retained
CSF1	CSF1	NM_172211.3	Pool1	chr1	+	Retained
CSF1	CSF1	NM_172212.2	Pool1	chr1	+	Retained
CSF2	CSF2	NM_000758.3	Pool1	chr5	+	Retained
CSF2RB	CSF2RB	NM_000395.2	Pool1	chr22	+	Retained
CSF3	CSF3	NM_000759.3	Pool1	chr17	+	Retained
CSF3	CSF3	NM_001178147.1	Pool1	chr17	+	Retained
CSF3	CSF3	NM_172219.2	Pool1	chr17	+	Retained
CSF3	CSF3	NM_172220.2	Pool1	chr17	+	Retained
CSF3	CSF3	NR_033662.1	Pool1	chr17	+	Retained
CTLA4	CTLA4	NM_001037631.2	Pool1	chr2	+	Retained
CTLA4	CTLA4	NM_005214.4	Pool1	chr2	+	Retained
CX3CL1	CX3CL1	NM_002996.3	Pool1	chr16	+	Retained
CX3CR1	CX3CR1	NM_001171174.1	Pool1	chr3	-	Filtered out
CXCL10	CXCL10	NM_001565.3	Pool1	chr4	-	Retained
CXCL11	CXCL11	NM_005409.4	Pool1	chr4	-	Retained
CXCL13	CXCL13	NM_006419.2	Pool1	chr4	+	Retained
CXCL14	CXCL14	NM_004887.4	Pool1	chr5	-	Retained
CXCL17	CXCL17	NM_198477.1	Pool1	chr19	-	Retained
CXCL2	CXCL2	NM_002089.3	Pool1	chr4	-	Retained
CXCL3	CXCL3	NM_002090.2	Pool1	chr4	-	Retained
CXCL5	CXCL5	NM_002994.3	Pool1	chr4	-	Retained
CXCL6	CXCL6	NM_002993.3	Pool1	chr4	+	Retained
CXCL9	CXCL9	NM_002416.1	Pool1	chr4	-	Retained
CXCR1	CXCR1	NM_000634.2	Pool1	chr2	-	Retained
CXCR2	CXCR2	NM_001168298.1	Pool1	chr2	+	Retained
CXCR2	CXCR2	NM_001557.3	Pool1	chr2	+	Retained
CXCR4	CXCR4	NM_003467.2	Pool1	chr2	-	Retained
CXCR6	CXCR6	NM_006564.1	Pool1	chr3	+	Retained
CYBB	CYBB	NM_000397.3	Pool1	chrX	+	Retained
CYP26B1	CYP26B1	NM_019885.2	Pool1	chr2	-	Retained
CYP2G1P	CYP2G1P	NR_040249.1	Pool1	chr19	+	Retained
CYP4F11	CYP4F11	NM_001128932.1	Pool1	chr19	-	Retained
CYP4F11	CYP4F11	NM_021187.3	Pool1	chr19	-	Retained
DARC	DARC	NM_001122951.2	Pool1	chr1	+	Filtered out
DCLK1	DCLK1	NM_001195415.1	Pool1	chr13	-	Retained
DCLK1	DCLK1	NM_001195416.1	Pool1	chr13	-	Retained
DCLK1	DCLK1	NM_004734.4	Pool1	chr13	-	Retained
DCN	DCN	NM_001920.3	Pool1	chr12	-	Retained
DCN	DCN	NM_133503.2	Pool1	chr12	-	Retained
DCN	DCN	NM_133504.2	Pool1	chr12	-	Retained
DCN	DCN	NM_133505.2	Pool1	chr12	-	Retained
DCX	DCX	NM_000555.3	Pool1	chrX	-	Retained
DCX	DCX	NM_001195553.1	Pool1	chrX	-	Retained
DCX	DCX	NM_178151.2	Pool1	chrX	-	Retained
DCX	DCX	NM_178152.2	Pool1	chrX	-	Retained
DCX	DCX	NM_178153.2	Pool1	chrX	-	Retained
DDX58	DDX58	NM_014314.3	Pool1	chr9	-	Retained
DEFA5	DEFA5	NM_021010.1	Pool1	chr8	-	Filtered out
DEFA6	DEFA6	NM_001926.3	Pool1	chr8	-	Filtered out
DLX1	DLX1	NM_178120.4	Pool1	chr2	+	Filtered out
DNAJC8	DNAJC8	NM_014280.2	Pool1	chr1	-	Retained
DOK2	DOK2	NM_003974.2	Pool1	chr8	-	Retained
DUOX1	DUOX1	NM_017434.3	Pool1	chr15	+	Retained
DUOX1	DUOX1	NM_175940.1	Pool1	chr15	+	Retained
DUOX2	DUOX2	NM_014080.4	Pool1	chr15	-	Retained
EBI3	EBI3	NM_005755.2	Pool1	chr19	+	Retained
ECSIT	ECSIT	NM_001142464.2	Pool1	chr19	-	Retained
ECSIT	ECSIT	NM_001142465.2	Pool1	chr19	-	Retained
ECSIT	ECSIT	NM_001243204.1	Pool1	chr19	-	Retained
ECSIT	ECSIT	NM_016581.4	Pool1	chr19	-	Retained
EDA2R	EDA2R	NM_001199687.2	Pool1	chrX	-	Retained
EDA2R	EDA2R	NM_001242310.1	Pool1	chrX	-	Retained
EDA2R	EDA2R	NM_021783.3	Pool1	chrX	-	Retained
EGFR	EGFR	NM_005228.3	Pool1	chr7	+	Retained
EGFR	EGFR	NM_201282.1	Pool1	chr7	+	Retained
EGFR	EGFR	NM_201283.1	Pool1	chr7	+	Retained
EGFR	EGFR	NM_201284.1	Pool1	chr7	+	Retained
ELANE	ELANE	NM_001972.2	Pool1	chr19	+	Retained
ELF3	ELF3	NM_001114309.1	Pool1	chr1	+	Retained
ELF3	ELF3	NM_004433.4	Pool1	chr1	+	Retained
ELK1	ELK1	NM_001114123.2	Pool1	chrX	-	Retained
ELK1	ELK1	NM_005229.4	Pool1	chrX	-	Retained
ENPP3	ENPP3	NM_005021.3	Pool1	chr6	+	Retained
EP300	EP300	NM_001429.3	Pool1	chr22	+	Retained
EPHX2	EPHX2	NM_001256482.1	Pool1	chr8	+	Retained
EPHX2	EPHX2	NM_001256483.1	Pool1	chr8	+	Retained
EPHX2	EPHX2	NM_001256484.1	Pool1	chr8	+	Retained
EPHX2	EPHX2	NM_001979.5	Pool1	chr8	+	Retained
EPO	EPO	NM_000799.2	Pool1	chr7	+	Filtered out
ERBB2	ERBB2	NM_001005862.1	Pool1	chr17	+	Retained
ERBB2	ERBB2	NM_004448.2	Pool1	chr17	+	Retained
ERBB2IP	ERBB2IP	NM_001006600.2	Pool1	chr5	+	Retained
ERBB2IP	ERBB2IP	NM_001253697.1	Pool1	chr5	+	Retained
ERBB2IP	ERBB2IP	NM_001253698.1	Pool1	chr5	+	Retained
ERBB2IP	ERBB2IP	NM_001253699.1	Pool1	chr5	+	Retained
ERBB2IP	ERBB2IP	NM_001253701.1	Pool1	chr5	+	Retained
ERBB2IP	ERBB2IP	NM_018695.3	Pool1	chr5	+	Retained
EREG	EREG	NM_001432.2	Pool1	chr4	+	Retained
ERMAP	ERMAP	NM_001017922.1	Pool1	chr1	+	Retained
ERMAP	ERMAP	NM_018538.3	Pool1	chr1	+	Retained
F2	F2	NM_000506.3	Pool1	chr11	+	Filtered out
F2R	F2R	NM_001992.3	Pool1	chr5	+	Retained
F2RL1	F2RL1	NM_005242.4	Pool1	chr5	+	Retained
F3	F3	NM_001178096.1	Pool1	chr1	-	Retained
F3	F3	NM_001993.4	Pool1	chr1	-	Retained
F8	F8	NM_000132.3	Pool1	chrX	-	Retained
F8	F8	NM_019863.2	Pool1	chrX	-	Retained
FABP4	FABP4	NM_001442.2	Pool1	chr8	-	Retained
FAM3B	FAM3B	NM_058186.3	Pool1	chr21	+	Retained
FAM3B	FAM3B	NM_206964.1	Pool1	chr21	+	Retained
FAM3D	FAM3D	NM_138805.2	Pool1	chr3	-	Retained
FAS	FAS	NM_000043.4	Pool1	chr10	+	Retained
FAS	FAS	NM_152871.2	Pool1	chr10	+	Retained
FAS	FAS	NM_152872.2	Pool1	chr10	+	Retained
FAS	FAS	NR_028033.2	Pool1	chr10	+	Retained
FAS	FAS	NR_028034.2	Pool1	chr10	+	Retained
FAS	FAS	NR_028035.2	Pool1	chr10	+	Retained
FAS	FAS	NR_028036.2	Pool1	chr10	+	Retained
FASLG	FASLG	NM_000639.1	Pool1	chr1	+	Retained
FCER1A	FCER1A	NM_002001.3	Pool1	chr1	+	Retained
FCGR3B	FCGR3B	NM_000570.4	Pool1	chr1	-	Retained
FCGR3B	FCGR3B	NM_001244753.1	Pool1	chr1	-	Retained
FCGR3B	FCGR3B	NM_001271035.1	Pool1	chr1	-	Retained
FCGR3B	FCGR3B	NM_001271036.1	Pool1	chr1	-	Retained
FES	FES	NM_001143783.1	Pool1	chr15	+	Retained
FES	FES	NM_001143784.1	Pool1	chr15	+	Retained
FES	FES	NM_001143785.1	Pool1	chr15	+	Retained
FES	FES	NM_002005.3	Pool1	chr15	+	Retained
FGF10	FGF10	NM_004465.1	Pool1	chr5	-	Filtered out
FGF12	FGF12	NM_004113.5	Pool1	chr3	-	Retained
FGF12	FGF12	NM_021032.4	Pool1	chr3	-	Retained
FIGF	FIGF	NM_004469.4	Pool1	chrX	-	Retained
FLNA	FLNA	NM_001110556.1	Pool1	chrX	-	Retained
FLNA	FLNA	NM_001456.3	Pool1	chrX	-	Retained
FLT1	FLT1	NM_001159920.1	Pool1	chr13	-	Retained
FLT1	FLT1	NM_001160030.1	Pool1	chr13	-	Retained
FLT1	FLT1	NM_001160031.1	Pool1	chr13	-	Retained
FLT1	FLT1	NM_002019.4	Pool1	chr13	-	Retained
FLT3LG	FLT3LG	NM_001204502.1	Pool1	chr19	+	Retained
FLT3LG	FLT3LG	NM_001204503.1	Pool1	chr19	+	Retained
FLT3LG	FLT3LG	NM_001459.3	Pool1	chr19	+	Retained
FLT4	FLT4	NM_002020.4	Pool1	chr5	-	Filtered out
FLT4	FLT4	NM_182925.4	Pool1	chr5	-	Filtered out
FN1	FN1	NM_002026.2	Pool1	chr2	-	Retained
FN1	FN1	NM_054034.2	Pool1	chr2	-	Retained
FN1	FN1	NM_212474.1	Pool1	chr2	-	Retained
FN1	FN1	NM_212476.1	Pool1	chr2	-	Retained
FN1	FN1	NM_212478.1	Pool1	chr2	-	Retained
FN1	FN1	NM_212482.1	Pool1	chr2	-	Retained
FOS	FOS	NM_005252.3	Pool1	chr14	+	Retained
FOXJ1	FOXJ1	NM_001454.3	Pool1	chr17	-	Retained
FOXO3	FOXO3	NM_001455.3	Pool1	chr6	+	Retained
FOXO3	FOXO3	NM_201559.2	Pool1	chr6	+	Retained
FOXP3	FOXP3	NM_001114377.1	Pool1	chrX	-	Retained
FOXP3	FOXP3	NM_014009.3	Pool1	chrX	-	Retained
FPR1	FPR1	NM_001193306.1	Pool1	chr19	-	Retained
FPR1	FPR1	NM_002029.3	Pool1	chr19	-	Retained
FPR2	FPR2	NM_001005738.1	Pool1	chr19	+	Retained
FRZB	FRZB	NM_001463.3	Pool1	chr2	-	Retained
FURIN	FURIN	NM_002569.2	Pool1	chr15	+	Retained
FYN	FYN	NM_002037.5	Pool1	chr6	-	Retained
FYN	FYN	NM_153047.3	Pool1	chr6	-	Retained
FYN	FYN	NM_153048.3	Pool1	chr6	-	Retained
GAB1	GAB1	NM_002039.3	Pool1	chr4	+	Retained
GAB1	GAB1	NM_207123.2	Pool1	chr4	+	Retained
GAB2	GAB2	NM_012296.3	Pool1	chr11	-	Retained
GAB2	GAB2	NM_080491.2	Pool1	chr11	-	Retained
GAK	GAK	NM_005255.2	Pool1	chr4	-	Retained
GAL	GAL	NM_015973.3	Pool1	chr11	+	Retained
GAP43	GAP43	NM_001130064.1	Pool1	chr3	+	Retained
GAP43	GAP43	NM_002045.3	Pool1	chr3	+	Retained
GATA2	GATA2	NM_001145661.1	Pool1	chr3	-	Retained
GATA2	GATA2	NM_032638.4	Pool1	chr3	-	Retained
GATA3	GATA3	NM_001002295.1	Pool1	chr10	+	Retained
GATA3	GATA3	NM_002051.2	Pool1	chr10	+	Retained
GDF10	GDF10	NM_004962.3	Pool1	chr10	-	Filtered out
GDF11	GDF11	NM_005811.3	Pool1	chr12	+	Retained
GDF15	GDF15	NM_004864.2	Pool1	chr19	+	Retained
GDF2	GDF2	NM_016204.1	Pool1	chr10	-	Filtered out
GDF3	GDF3	NM_020634.1	Pool1	chr12	-	Filtered out
GDF5	GDF5	NM_000557.2	Pool1	chr20	-	Retained
GDF6	GDF6	NM_001001557.2	Pool1	chr8	-	Filtered out
GDF9	GDF9	NM_005260.3	Pool1	chr5	-	Retained
GHSR	GHSR	NM_198407.2	Pool1	chr3	-	Filtered out
GLMN	GLMN	NM_053274.2	Pool1	chr1	-	Retained
GPI	GPI	NM_000175.3	Pool1	chr19	+	Retained
GPI	GPI	NM_001184722.1	Pool1	chr19	+	Retained
GPR17	GPR17	NM_001161415.1	Pool1	chr2	+	Filtered out
GPR17	GPR17	NM_005291.2	Pool1	chr2	+	Filtered out
GPR68	GPR68	NM_001177676.1	Pool1	chr14	-	Retained
GPX4	GPX4	NM_001039847.1	Pool1	chr19	+	Retained
GPX4	GPX4	NM_001039848.1	Pool1	chr19	+	Retained
GPX4	GPX4	NM_002085.3	Pool1	chr19	+	Retained
GRB2	GRB2	NM_002086.4	Pool1	chr17	-	Retained
GRB2	GRB2	NM_203506.2	Pool1	chr17	-	Retained
GREM2	GREM2	NM_022469.3	Pool1	chr1	-	Retained
GRIA2	GRIA2	NM_000826.3	Pool1	chr4	+	Retained
GRIA2	GRIA2	NM_001083619.1	Pool1	chr4	+	Retained
GRIA2	GRIA2	NM_001083620.1	Pool1	chr4	+	Retained
GRN	GRN	NM_002087.2	Pool1	chr17	+	Retained
GSK3A	GSK3A	NM_019884.2	Pool1	chr19	-	Retained
GSK3B	GSK3B	NM_001146156.1	Pool1	chr3	-	Retained
GSK3B	GSK3B	NM_002093.3	Pool1	chr3	-	Retained
GUK1	GUK1	NM_000858.5	Pool1	chr1	+	Retained
GUK1	GUK1	NM_001159390.1	Pool1	chr1	+	Retained
GUK1	GUK1	NM_001159391.1	Pool1	chr1	+	Retained
GUK1	GUK1	NM_001242839.1	Pool1	chr1	+	Retained
GUK1	GUK1	NM_001242840.1	Pool1	chr1	+	Retained
HAVCR2	HAVCR2	NM_032782.4	Pool1	chr5	-	Retained
HBEGF	HBEGF	NM_001945.2	Pool1	chr5	-	Retained
HCK	HCK	NM_001172129.1	Pool1	chr20	+	Retained
HCK	HCK	NM_001172130.1	Pool1	chr20	+	Retained
HCK	HCK	NM_001172131.1	Pool1	chr20	+	Retained
HCK	HCK	NM_001172132.1	Pool1	chr20	+	Retained
HCK	HCK	NM_001172133.1	Pool1	chr20	+	Retained
HCK	HCK	NM_002110.3	Pool1	chr20	+	Retained
HDAC1	HDAC1	NM_004964.2	Pool1	chr1	+	Retained
HDAC4	HDAC4	NM_006037.3	Pool1	chr2	-	Retained
HDAC5	HDAC5	NM_001015053.1	Pool1	chr17	-	Retained
HDAC5	HDAC5	NM_005474.4	Pool1	chr17	-	Retained
HDAC9	HDAC9	NM_001204144.1	Pool1	chr7	+	Retained
HDAC9	HDAC9	NM_001204145.1	Pool1	chr7	+	Retained
HDAC9	HDAC9	NM_001204146.1	Pool1	chr7	+	Retained
HDAC9	HDAC9	NM_001204147.1	Pool1	chr7	+	Retained
HDAC9	HDAC9	NM_001204148.1	Pool1	chr7	+	Retained
HDAC9	HDAC9	NM_014707.1	Pool1	chr7	+	Retained
HDAC9	HDAC9	NM_058176.2	Pool1	chr7	+	Retained
HDAC9	HDAC9	NM_178423.1	Pool1	chr7	+	Retained
HDAC9	HDAC9	NM_178425.2	Pool1	chr7	+	Retained
HEMGN	HEMGN	NM_018437.3	Pool1	chr9	-	Filtered out
HEMGN	HEMGN	NM_197978.1	Pool1	chr9	-	Filtered out
HES6	HES6	NM_001142853.1	Pool1	chr2	-	Retained
HES6	HES6	NM_018645.4	Pool1	chr2	-	Retained
HGF	HGF	NM_000601.4	Pool1	chr7	-	Retained
HGF	HGF	NM_001010931.1	Pool1	chr7	-	Retained
HGF	HGF	NM_001010932.1	Pool1	chr7	-	Retained
HGF	HGF	NM_001010933.1	Pool1	chr7	-	Retained
HGF	HGF	NM_001010934.1	Pool1	chr7	-	Retained
HIST1H4C	HIST1H4C	NM_003542.3	Pool1	chr6	+	Retained
HMOX1	HMOX1	NM_002133.2	Pool1	chr22	+	Retained
HPGDS	HPGDS	NM_014485.2	Pool1	chr4	-	Retained
HRAS	HRAS	NM_001130442.1	Pool1	chr11	-	Retained
HRAS	HRAS	NM_005343.2	Pool1	chr11	-	Retained
HRAS	HRAS	NM_176795.3	Pool1	chr11	-	Retained
HSPB2	HSPB2	NM_001541.3	Pool1	chr11	+	Retained
HSPD1	HSPD1	NM_002156.4	Pool1	chr2	-	Retained
HSPD1	HSPD1	NM_199440.1	Pool1	chr2	-	Retained
HTR3A	HTR3A	NM_000869.5	Pool1	chr11	+	Retained
HTR3A	HTR3A	NM_001161772.2	Pool1	chr11	+	Retained
HTR3A	HTR3A	NM_213621.3	Pool1	chr11	+	Retained
HTR3A	HTR3A	NR_046363.1	Pool1	chr11	+	Retained
IBSP	IBSP	NM_004967.3	Pool1	chr4	+	Filtered out
ICAM1	ICAM1	NM_000201.2	Pool1	chr19	+	Retained
ICOS	ICOS	NM_012092.3	Pool1	chr2	+	Retained
ICOSLG	ICOSLG	NM_015259.4	Pool1	chr21	-	Retained
IFIH1	IFIH1	NM_022168.3	Pool1	chr2	-	Retained
IFNA16	IFNA16	NM_002173.2	Pool1	chr9	-	Retained
IFNA2	IFNA2	NM_000605.3	Pool1	chr9	-	Retained
IFNA4	IFNA4	NM_021068.2	Pool1	chr9	-	Retained
IFNA5	IFNA5	NM_002169.2	Pool1	chr9	-	Retained
IFNA6	IFNA6	NM_021002.2	Pool1	chr9	-	Filtered out
IFNA7	IFNA7	NM_021057.2	Pool1	chr9	-	Filtered out
IFNA8	IFNA8	NM_002170.3	Pool1	chr9	+	Retained
IFN-ALPHA	IFNA1	NM_024013.2	Pool1	chr9	+	Retained
IFNAR1	IFNAR1	NM_000629.2	Pool1	chr21	+	Retained
IFNAR2	IFNAR2	NM_000874.3	Pool1	chr21	+	Retained
IFNAR2	IFNAR2	NM_207584.1	Pool1	chr21	+	Retained
IFNAR2	IFNAR2	NM_207585.1	Pool1	chr21	+	Retained
IFNB1	IFNB1	NM_002176.2	Pool1	chr9	-	Retained
IFNE	IFNE	NM_176891.4	Pool1	chr9	-	Retained
IFNG	IFNG	NM_000619.2	Pool1	chr12	-	Retained
IFNGR1	IFNGR1	NM_000416.2	Pool1	chr6	-	Retained
IFNGR2	IFNGR2	NM_005534.3	Pool1	chr21	+	Retained
IFNK	IFNK	NM_020124.2	Pool1	chr9	+	Filtered out
IFNW1	IFNW1	NM_002177.1	Pool1	chr9	-	Retained
IGFBP4	IGFBP4	NM_001552.2	Pool1	chr17	+	Retained
IK	IK	NM_006083.3	Pool1	chr5	+	Retained
IKBKB	IKBKB	NM_001190720.2	Pool1	chr8	+	Retained
IKBKB	IKBKB	NM_001242778.1	Pool1	chr8	+	Retained
IKBKB	IKBKB	NM_001556.2	Pool1	chr8	+	Retained
IKBKB	IKBKB	NR_033818.1	Pool1	chr8	+	Retained
IKBKB	IKBKB	NR_033819.1	Pool1	chr8	+	Retained
IKBKB	IKBKB	NR_040009.1	Pool1	chr8	+	Retained
IKBKG	IKBKG	NM_001099856.2	Pool1	chrX	+	Retained
IKBKG	IKBKG	NM_001099857.1	Pool1	chrX	+	Retained
IKBKG	IKBKG	NM_001145255.1	Pool1	chrX	+	Retained
IKBKG	IKBKG	NM_003639.3	Pool1	chrX	+	Retained
IL10	IL10	NM_000572.2	Pool1	chr1	-	Retained
IL10RA	IL10RA	NM_001558.3	Pool1	chr11	+	Retained
IL10RA	IL10RA	NR_026691.1	Pool1	chr11	+	Retained
IL10RB	IL10RB	NM_000628.4	Pool1	chr21	+	Retained
IL11	IL11	NM_000641.3	Pool1	chr19	-	Retained
IL11	IL11	NM_001267718.1	Pool1	chr19	-	Retained
IL12A	IL12A	NM_000882.3	Pool1	chr3	+	Retained
IL12B	IL12B	NM_002187.2	Pool1	chr5	-	Filtered out
IL12RB1	IL12RB1	NM_005535.1	Pool1	chr19	-	Retained
IL12RB1	IL12RB1	NM_153701.1	Pool1	chr19	-	Retained
IL12RB2	IL12RB2	NM_001258214.1	Pool1	chr1	+	Retained
IL12RB2	IL12RB2	NM_001258215.1	Pool1	chr1	+	Retained
IL12RB2	IL12RB2	NM_001258216.1	Pool1	chr1	+	Retained
IL12RB2	IL12RB2	NM_001559.2	Pool1	chr1	+	Retained
IL12RB2	IL12RB2	NR_047583.1	Pool1	chr1	+	Retained
IL12RB2	IL12RB2	NR_047584.1	Pool1	chr1	+	Retained
IL13	IL13	NM_002188.2	Pool1	chr5	+	Filtered out
IL13RA2	IL13RA2	NM_000640.2	Pool1	chrX	-	Retained
IL15	IL15	NM_000585.4	Pool1	chr4	+	Retained
IL15	IL15	NM_172175.2	Pool1	chr4	+	Retained
IL15	IL15	NR_037840.2	Pool1	chr4	+	Retained
IL15RA	IL15RA	NM_001243539.1	Pool1	chr10	-	Retained
IL15RA	IL15RA	NM_001256765.1	Pool1	chr10	-	Retained
IL15RA	IL15RA	NM_002189.3	Pool1	chr10	-	Retained
IL15RA	IL15RA	NM_172200.2	Pool1	chr10	-	Retained
IL15RA	IL15RA	NR_046362.1	Pool1	chr10	-	Retained
IL16	IL16	NM_001172128.1	Pool1	chr15	+	Retained
IL16	IL16	NM_004513.5	Pool1	chr15	+	Retained
IL16	IL16	NM_172217.3	Pool1	chr15	+	Retained
IL17	IL17A	NM_002190.2	Pool1	chr6	+	Retained
IL17B	IL17B	NM_014443.2	Pool1	chr5	-	Retained
IL17C	IL17C	NM_013278.3	Pool1	chr16	+	Retained
IL17F	IL17F	NM_052872.3	Pool1	chr6	-	Retained
IL17RA	IL17RA	NM_014339.5	Pool1	chr22	+	Retained
IL17RB	IL17RB	NM_018725.3	Pool1	chr3	+	Retained
IL17RC	IL17RC	NM_001203263.1	Pool1	chr3	+	Retained
IL17RC	IL17RC	NM_001203264.1	Pool1	chr3	+	Retained
IL17RC	IL17RC	NM_001203265.1	Pool1	chr3	+	Retained
IL17RC	IL17RC	NM_032732.5	Pool1	chr3	+	Retained
IL17RC	IL17RC	NM_153460.3	Pool1	chr3	+	Retained
IL17RC	IL17RC	NM_153461.3	Pool1	chr3	+	Retained
IL17RC	IL17RC	NR_037807.1	Pool1	chr3	+	Retained
IL17RD	IL17RD	NM_017563.3	Pool1	chr3	-	Retained
IL17RE	IL17RE	NM_001193380.1	Pool1	chr3	+	Retained
IL17RE	IL17RE	NM_153480.1	Pool1	chr3	+	Retained
IL17RE	IL17RE	NM_153483.2	Pool1	chr3	+	Retained
IL18	IL18	NM_001243211.1	Pool1	chr11	-	Retained
IL18	IL18	NM_001562.3	Pool1	chr11	-	Retained
IL18BP	IL18BP	NM_001039659.1	Pool1	chr11	+	Retained
IL18BP	IL18BP	NM_001039660.1	Pool1	chr11	+	Retained
IL18BP	IL18BP	NM_001145055.1	Pool1	chr11	+	Retained
IL18BP	IL18BP	NM_001145057.1	Pool1	chr11	+	Retained
IL18BP	IL18BP	NM_005699.3	Pool1	chr11	+	Retained
IL18BP	IL18BP	NM_173042.2	Pool1	chr11	+	Retained
IL18BP	IL18BP	NM_173044.2	Pool1	chr11	+	Retained
IL18R1	IL18R1	NM_003855.2	Pool1	chr2	+	Retained
IL18RAP	IL18RAP	NM_003853.2	Pool1	chr2	+	Retained
IL19	IL19	NM_013371.3	Pool1	chr1	+	Retained
IL19	IL19	NM_153758.2	Pool1	chr1	+	Retained
IL1A	IL1A	NM_000575.3	Pool1	chr2	-	Filtered out
IL-1B	IL1B	NM_000576.2	Pool1	chr2	-	Retained
IL1R1	IL1R1	NM_000877.2	Pool1	chr2	+	Retained
IL1R2	IL1R2	NM_001261419.1	Pool1	chr2	+	Retained
IL1R2	IL1R2	NM_004633.3	Pool1	chr2	+	Retained
IL1R2	IL1R2	NR_048564.1	Pool1	chr2	+	Retained
IL1RAP	IL1RAP	NM_001167928.1	Pool1	chr3	+	Retained
IL1RAP	IL1RAP	NM_001167929.1	Pool1	chr3	+	Retained
IL1RAP	IL1RAP	NM_001167930.1	Pool1	chr3	+	Retained
IL1RAP	IL1RAP	NM_001167931.1	Pool1	chr3	+	Retained
IL1RAP	IL1RAP	NM_002182.3	Pool1	chr3	+	Retained
IL1RAP	IL1RAP	NM_134470.3	Pool1	chr3	+	Retained
IL1RAPL2	IL1RAPL2	NM_017416.1	Pool1	chrX	+	Filtered out
IL1RL1	IL1RL1	NM_003856.2	Pool1	chr2	+	Retained
IL1RL1	IL1RL1	NM_016232.4	Pool1	chr2	+	Retained
IL1RL2	IL1RL2	NM_003854.2	Pool1	chr2	+	Retained
IL1RN	IL1RN	NM_000577.4	Pool1	chr2	+	Retained
IL1RN	IL1RN	NM_173841.2	Pool1	chr2	+	Retained
IL1RN	IL1RN	NM_173842.2	Pool1	chr2	+	Retained
IL1RN	IL1RN	NM_173843.2	Pool1	chr2	+	Retained
IL-2	IL2	NM_000586.3	Pool1	chr4	-	Retained
IL20	IL20	NM_018724.3	Pool1	chr1	+	Retained
IL21	IL21	NM_001207006.2	Pool1	chr4	-	Retained
IL21	IL21	NM_021803.3	Pool1	chr4	-	Retained
IL21R	IL21R	NM_021798.3	Pool1	chr16	+	Retained
IL21R	IL21R	NM_181078.2	Pool1	chr16	+	Retained
IL21R	IL21R	NM_181079.4	Pool1	chr16	+	Retained
IL22	IL22	NM_020525.4	Pool1	chr12	-	Retained
IL22RA1	IL22RA1	NM_021258.3	Pool1	chr1	-	Retained
IL22RA2	IL22RA2	NM_052962.2	Pool1	chr6	-	Filtered out
IL22RA2	IL22RA2	NM_181309.1	Pool1	chr6	-	Filtered out
IL22RA2	IL22RA2	NM_181310.1	Pool1	chr6	-	Filtered out
IL23A	IL23A	NM_016584.2	Pool1	chr12	+	Retained
IL23R	IL23R	NM_144701.2	Pool1	chr1	+	Filtered out
IL24	IL24	NM_001185156.1	Pool1	chr1	+	Filtered out
IL24	IL24	NM_001185157.1	Pool1	chr1	+	Filtered out
IL24	IL24	NM_001185158.1	Pool1	chr1	+	Filtered out
IL24	IL24	NM_006850.3	Pool1	chr1	+	Filtered out
IL25	IL25	NM_022789.3	Pool1	chr14	+	Filtered out
IL25	IL25	NM_172314.1	Pool1	chr14	+	Filtered out
IL26	IL26	NM_018402.1	Pool1	chr12	-	Retained
IL27	IL27	NM_145659.3	Pool1	chr16	-	Retained
IL27RA	IL27RA	NM_004843.3	Pool1	chr19	+	Retained
IL28A	IL28A	NM_172138.1	Pool1	chr19	+	Retained
IL29	IL29	NM_172140.1	Pool1	chr19	+	Retained
IL2RA	IL2RA	NM_000417.2	Pool1	chr10	-	Retained
IL2RB	IL2RB	NM_000878.3	Pool1	chr22	-	Retained
IL2RG	IL2RG	NM_000206.2	Pool1	chrX	-	Retained
IL3	IL3	NM_000588.3	Pool1	chr5	+	Filtered out
IL31RA	IL31RA	NM_001242636.1	Pool1	chr5	+	Filtered out
IL31RA	IL31RA	NM_001242637.1	Pool1	chr5	+	Filtered out
IL31RA	IL31RA	NM_001242638.1	Pool1	chr5	+	Filtered out
IL31RA	IL31RA	NM_001242639.1	Pool1	chr5	+	Filtered out
IL31RA	IL31RA	NM_139017.5	Pool1	chr5	+	Filtered out
IL32	IL32	NM_001012631.1	Pool1	chr16	+	Retained
IL32	IL32	NM_001012632.1	Pool1	chr16	+	Retained
IL32	IL32	NM_001012633.1	Pool1	chr16	+	Retained
IL32	IL32	NM_001012634.1	Pool1	chr16	+	Retained
IL32	IL32	NM_001012635.1	Pool1	chr16	+	Retained
IL32	IL32	NM_001012636.1	Pool1	chr16	+	Retained
IL32	IL32	NM_001012718.1	Pool1	chr16	+	Retained
IL32	IL32	NM_004221.4	Pool1	chr16	+	Retained
IL33	IL33	NM_001199640.1	Pool1	chr9	+	Retained
IL33	IL33	NM_001199641.1	Pool1	chr9	+	Retained
IL33	IL33	NM_033439.3	Pool1	chr9	+	Retained
IL3RA	IL3RA	NM_001267713.1	Pool1	chrX	+	Retained
IL3RA	IL3RA	NM_002183.3	Pool1	chrX	+	Retained
IL4	IL4	NM_000589.3	Pool1	chr5	+	Filtered out
IL4	IL4	NM_172348.2	Pool1	chr5	+	Filtered out
IL4R	IL4R	NM_000418.3	Pool1	chr16	+	Retained
IL4R	IL4R	NM_001257406.1	Pool1	chr16	+	Retained
IL4R	IL4R	NM_001257407.1	Pool1	chr16	+	Retained
IL4R	IL4R	NM_001257997.1	Pool1	chr16	+	Retained
IL5	IL5	NM_000879.2	Pool1	chr5	-	Filtered out
IL5RA	IL5RA	NM_000564.4	Pool1	chr3	-	Retained
IL5RA	IL5RA	NM_001243099.1	Pool1	chr3	-	Retained
IL5RA	IL5RA	NM_175724.2	Pool1	chr3	-	Retained
IL5RA	IL5RA	NM_175725.2	Pool1	chr3	-	Retained
IL5RA	IL5RA	NM_175726.3	Pool1	chr3	-	Retained
IL5RA	IL5RA	NM_175727.2	Pool1	chr3	-	Retained
IL5RA	IL5RA	NM_175728.2	Pool1	chr3	-	Retained
IL6	IL6	NM_000600.3	Pool1	chr7	+	Retained
IL6R	IL6R	NM_000565.3	Pool1	chr1	+	Retained
IL6R	IL6R	NM_001206866.1	Pool1	chr1	+	Retained
IL6R	IL6R	NM_181359.2	Pool1	chr1	+	Retained
IL6ST	IL6ST	NM_001190981.1	Pool1	chr5	-	Retained
IL6ST	IL6ST	NM_002184.3	Pool1	chr5	-	Retained
IL6ST	IL6ST	NM_175767.2	Pool1	chr5	-	Retained
IL7	IL7	NM_000880.3	Pool1	chr8	-	Retained
IL7	IL7	NM_001199886.1	Pool1	chr8	-	Retained
IL7	IL7	NM_001199887.1	Pool1	chr8	-	Retained
IL7	IL7	NM_001199888.1	Pool1	chr8	-	Retained
IL7R	IL7R	NM_002185.3	Pool1	chr5	+	Retained
IL8	IL8	NM_000584.3	Pool1	chr4	+	Retained
IL9	IL9	NM_000590.1	Pool1	chr5	-	Filtered out
IL9R	IL9R	NM_002186.2	Pool1	chrX	+	Retained
IL9R	IL9R	NM_176786.1	Pool1	chrX	+	Retained
INHA	INHA	NM_002191.3	Pool1	chr2	+	Filtered out
INHBA	INHBA	NM_002192.2	Pool1	chr7	-	Retained
INHBB	INHBB	NM_002193.2	Pool1	chr2	+	Retained
INPP5D	INPP5D	NM_001017915.1	Pool1	chr2	+	Retained
INPP5D	INPP5D	NM_005541.3	Pool1	chr2	+	Retained
INS	INS	NM_000207.2	Pool1	chr11	-	Filtered out
INS	INS	NM_001185097.1	Pool1	chr11	-	Filtered out
INS	INS	NM_001185098.1	Pool1	chr11	-	Filtered out
IPO8	IPO8	NM_001190995.1	Pool1	chr12	-	Retained
IPO8	IPO8	NM_006390.3	Pool1	chr12	-	Retained
IRAK1	IRAK1	NM_001025242.1	Pool1	chrX	-	Retained
IRAK1	IRAK1	NM_001025243.1	Pool1	chrX	-	Retained
IRAK1	IRAK1	NM_001569.3	Pool1	chrX	-	Retained
IRAK2	IRAK2	NM_001570.3	Pool1	chr3	+	Retained
IRAK3	IRAK3	NM_001142523.1	Pool1	chr12	+	Retained
IRAK3	IRAK3	NM_007199.2	Pool1	chr12	+	Retained
IRAK4	IRAK4	NM_001114182.2	Pool1	chr12	+	Retained
IRAK4	IRAK4	NM_001145256.1	Pool1	chr12	+	Retained
IRAK4	IRAK4	NM_001145257.1	Pool1	chr12	+	Retained
IRAK4	IRAK4	NM_001145258.1	Pool1	chr12	+	Retained
IRAK4	IRAK4	NM_016123.3	Pool1	chr12	+	Retained
IRF1	IRF1	NM_002198.2	Pool1	chr5	-	Retained
IRF3	IRF3	NM_001197122.1	Pool1	chr19	-	Retained
IRF3	IRF3	NM_001197123.1	Pool1	chr19	-	Retained
IRF3	IRF3	NM_001197124.1	Pool1	chr19	-	Retained
IRF3	IRF3	NM_001197125.1	Pool1	chr19	-	Retained
IRF3	IRF3	NM_001197126.1	Pool1	chr19	-	Retained
IRF3	IRF3	NM_001197127.1	Pool1	chr19	-	Retained
IRF3	IRF3	NM_001197128.1	Pool1	chr19	-	Retained
IRF3	IRF3	NM_001571.5	Pool1	chr19	-	Retained
IRF3	IRF3	NR_045568.1	Pool1	chr19	-	Retained
IRF7	IRF7	NM_001572.3	Pool1	chr11	-	Retained
IRF7	IRF7	NM_004029.2	Pool1	chr11	-	Retained
IRF7	IRF7	NM_004031.2	Pool1	chr11	-	Retained
IRS1	IRS1	NM_005544.2	Pool1	chr2	-	Retained
IRS2	IRS2	NM_003749.2	Pool1	chr13	-	Retained
ITCH	ITCH	NM_001257137.1	Pool1	chr20	+	Retained
ITCH	ITCH	NM_001257138.1	Pool1	chr20	+	Retained
ITCH	ITCH	NM_031483.5	Pool1	chr20	+	Retained
ITGAL	ITGAL	NM_001114380.1	Pool1	chr16	+	Retained
ITGAL	ITGAL	NM_002209.2	Pool1	chr16	+	Retained
ITGB1	ITGB1	NM_002211.3	Pool1	chr10	-	Retained
ITGB1	ITGB1	NM_033668.2	Pool1	chr10	-	Retained
ITGB1	ITGB1	NM_133376.2	Pool1	chr10	-	Retained
ITGB2	ITGB2	NM_000211.3	Pool1	chr21	-	Retained
ITGB2	ITGB2	NM_001127491.1	Pool1	chr21	-	Retained
ITGB6	ITGB6	NM_000888.3	Pool1	chr2	-	Retained
JAK1	JAK1	NM_002227.2	Pool1	chr1	-	Retained
JAK2	JAK2	NM_004972.3	Pool1	chr9	+	Retained
JAK3	JAK3	NM_000215.3	Pool1	chr19	-	Retained
JARID2	JARID2	NM_001267040.1	Pool1	chr6	+	Retained
JARID2	JARID2	NM_004973.3	Pool1	chr6	+	Retained
JUN	JUN	NM_002228.3	Pool1	chr1	-	Retained
JUNB	JUNB	NM_002229.2	Pool1	chr19	+	Retained
KDR	KDR	NM_002253.2	Pool1	chr4	-	Retained
KIT	KIT	NM_000222.2	Pool1	chr4	+	Retained
KIT	KIT	NM_001093772.1	Pool1	chr4	+	Retained
KITLG	KITLG	NM_000899.4	Pool1	chr12	-	Retained
KITLG	KITLG	NM_003994.5	Pool1	chr12	-	Retained
KLK1	KLK1	NM_002257.2	Pool1	chr19	-	Retained
KLK14	KLK14	NM_022046.4	Pool1	chr19	-	Retained
KLK15	KLK15	NM_017509.2	Pool1	chr19	-	Filtered out
KLK15	KLK15	NM_138563.1	Pool1	chr19	-	Filtered out
KLK15	KLK15	NM_138564.1	Pool1	chr19	-	Filtered out
KLKB1	KLKB1	NM_000892.3	Pool1	chr4	+	Retained
KLRG1	KLRG1	NM_005810.3	Pool1	chr12	+	Retained
KNG1	KNG1	NM_000893.3	Pool1	chr3	+	Filtered out
KNG1	KNG1	NM_001102416.2	Pool1	chr3	+	Filtered out
KNG1	KNG1	NM_001166451.1	Pool1	chr3	+	Filtered out
KRAS	KRAS	NM_004985.3	Pool1	chr12	-	Retained
KRAS	KRAS	NM_033360.2	Pool1	chr12	-	Retained
KRT1	KRT1	NM_006121.3	Pool1	chr12	-	Retained
KRT17	KRT17	NM_000422.2	Pool1	chr17	-	Retained
KRT19	KRT19	NM_002276.4	Pool1	chr17	-	Retained
KRT5	KRT5	NM_000424.3	Pool1	chr12	-	Retained
KRT7	KRT7	NM_005556.3	Pool1	chr12	+	Retained
LAMA5	LAMA5	NM_005560.3	Pool1	chr20	-	Retained
LAMB1	LAMB1	NM_002291.2	Pool1	chr7	-	Retained
LAMB2	LAMB2	NM_002292.3	Pool1	chr3	-	Retained
LAMC1	LAMC1	NM_002293.3	Pool1	chr1	+	Retained
LAMC2	LAMC2	NM_005562.2	Pool1	chr1	+	Retained
LAMC2	LAMC2	NM_018891.2	Pool1	chr1	+	Retained
LBP	LBP	NM_004139.3	Pool1	chr20	+	Filtered out
LCK	LCK	NM_001042771.1	Pool1	chr1	+	Retained
LCK	LCK	NM_005356.3	Pool1	chr1	+	Retained
LEFTY1	LEFTY1	NM_020997.3	Pool1	chr1	-	Retained
LEFTY2	LEFTY2	NM_003240.3	Pool1	chr1	-	Filtered out
LEP	LEP	NM_000230.2	Pool1	chr7	+	Filtered out
LEPR	LEPR	NM_001003679.3	Pool1	chr1	+	Retained
LEPR	LEPR	NM_001003680.3	Pool1	chr1	+	Retained
LEPR	LEPR	NM_001198687.1	Pool1	chr1	+	Retained
LEPR	LEPR	NM_001198688.1	Pool1	chr1	+	Retained
LEPR	LEPR	NM_001198689.1	Pool1	chr1	+	Retained
LEPR	LEPR	NM_002303.5	Pool1	chr1	+	Retained
LIF	LIF	NM_002309.4	Pool1	chr22	-	Retained
LILRB1	LILRB1	NM_001081637.1	Pool1	chr19	+	Retained
LILRB1	LILRB1	NM_001081638.1	Pool1	chr19	+	Retained
LILRB1	LILRB1	NM_001081639.1	Pool1	chr19	+	Retained
LILRB1	LILRB1	NM_006669.3	Pool1	chr19	+	Retained
LRP8	LRP8	NM_001018054.2	Pool1	chr1	-	Retained
LRP8	LRP8	NM_004631.4	Pool1	chr1	-	Retained
LRP8	LRP8	NM_017522.4	Pool1	chr1	-	Retained
LRP8	LRP8	NM_033300.3	Pool1	chr1	-	Retained
LTA	LTA	NM_000595.3	Pool1	chr6	+	Retained
LTA	LTA	NM_001159740.2	Pool1	chr6	+	Retained
LTA4H	LTA4H	NM_000895.2	Pool1	chr12	-	Retained
LTA4H	LTA4H	NM_001256643.1	Pool1	chr12	-	Retained
LTA4H	LTA4H	NM_001256644.1	Pool1	chr12	-	Retained
LTB	LTB	NM_002341.1	Pool1	chr6	-	Retained
LTB	LTB	NM_009588.1	Pool1	chr6	-	Retained
LTB4R	LTB4R	NM_001143919.2	Pool1	chr14	+	Retained
LTBP4	LTBP4	NM_001042544.1	Pool1	chr19	+	Retained
LTBP4	LTBP4	NM_001042545.1	Pool1	chr19	+	Retained
LTBP4	LTBP4	NM_003573.2	Pool1	chr19	+	Retained
LTBR	LTBR	NM_001270987.1	Pool1	chr12	+	Retained
LTBR	LTBR	NM_002342.2	Pool1	chr12	+	Retained
LTC4S	LTC4S	NM_145867.1	Pool1	chr5	+	Retained
LTF	LTF	NM_001199149.1	Pool1	chr3	-	Retained
LTF	LTF	NM_002343.3	Pool1	chr3	-	Retained
LY75	LY75	NM_002349.3	Pool1	chr2	-	Retained
LY86	LY86	NM_004271.3	Pool1	chr6	+	Retained
LYN	LYN	NM_001111097.2	Pool1	chr8	+	Retained
LYN	LYN	NM_002350.3	Pool1	chr8	+	Retained
LYPD2	LYPD2	NM_205545.1	Pool1	chr8	-	Retained
MAG	MAG	NM_001199216.1	Pool1	chr19	+	Filtered out
MAG	MAG	NM_002361.3	Pool1	chr19	+	Filtered out
MAG	MAG	NM_080600.2	Pool1	chr19	+	Filtered out
MALT1	MALT1	NM_006785.2	Pool1	chr18	+	Retained
MALT1	MALT1	NM_173844.1	Pool1	chr18	+	Retained
MAP2K1	MAP2K1	NM_002755.3	Pool1	chr15	+	Retained
MAP2K2	MAP2K2	NM_030662.3	Pool1	chr19	-	Retained
MAP2K4	MAP2K4	NM_003010.2	Pool1	chr17	+	Retained
MAP2K6	MAP2K6	NM_002758.3	Pool1	chr17	+	Retained
MAP2K7	MAP2K7	NM_145185.2	Pool1	chr19	+	Retained
MAP3K1	MAP3K1	NM_005921.1	Pool1	chr5	+	Retained
MAP3K2	MAP3K2	NM_006609.4	Pool1	chr2	-	Retained
MAP3K3	MAP3K3	NM_002401.3	Pool1	chr17	+	Retained
MAP3K3	MAP3K3	NM_203351.1	Pool1	chr17	+	Retained
MAP3K7	MAP3K7	NM_003188.3	Pool1	chr6	-	Retained
MAP3K7	MAP3K7	NM_145331.2	Pool1	chr6	-	Retained
MAP3K7	MAP3K7	NM_145332.2	Pool1	chr6	-	Retained
MAP3K7	MAP3K7	NM_145333.2	Pool1	chr6	-	Retained
MAPK1	MAPK1	NM_002745.4	Pool1	chr22	-	Retained
MAPK1	MAPK1	NM_138957.2	Pool1	chr22	-	Retained
MAPK11	MAPK11	NM_002751.5	Pool1	chr22	-	Retained
MAPK14	MAPK14	NM_001315.2	Pool1	chr6	+	Retained
MAPK14	MAPK14	NM_139012.2	Pool1	chr6	+	Retained
MAPK14	MAPK14	NM_139013.2	Pool1	chr6	+	Retained
MAPK14	MAPK14	NM_139014.2	Pool1	chr6	+	Retained
MAPK3	MAPK3	NM_001040056.1	Pool1	chr16	-	Retained
MAPK3	MAPK3	NM_001109891.1	Pool1	chr16	-	Retained
MAPK3	MAPK3	NM_002746.2	Pool1	chr16	-	Retained
MAPK8	MAPK8	NM_002750.2	Pool1	chr10	+	Retained
MAPK8	MAPK8	NM_139046.1	Pool1	chr10	+	Retained
MAPK8	MAPK8	NM_139047.1	Pool1	chr10	+	Retained
MAPK8	MAPK8	NM_139049.1	Pool1	chr10	+	Retained
MAPK9	MAPK9	NM_001135044.1	Pool1	chr5	-	Retained
MAPK9	MAPK9	NM_002752.4	Pool1	chr5	-	Retained
MAPK9	MAPK9	NM_139068.2	Pool1	chr5	-	Retained
MAPK9	MAPK9	NM_139069.2	Pool1	chr5	-	Retained
MAPK9	MAPK9	NM_139070.2	Pool1	chr5	-	Retained
MAPKAPK2	MAPKAPK2	NM_004759.4	Pool1	chr1	+	Retained
MAPKAPK2	MAPKAPK2	NM_032960.3	Pool1	chr1	+	Retained
MAPT	MAPT	NM_001123066.3	Pool1	chr17	+	Retained
MAPT	MAPT	NM_001123067.3	Pool1	chr17	+	Retained
MAPT	MAPT	NM_001203251.1	Pool1	chr17	+	Retained
MAPT	MAPT	NM_001203252.1	Pool1	chr17	+	Retained
MAPT	MAPT	NM_005910.5	Pool1	chr17	+	Retained
MAPT	MAPT	NM_016834.4	Pool1	chr17	+	Retained
MAPT	MAPT	NM_016835.4	Pool1	chr17	+	Retained
MAPT	MAPT	NM_016841.4	Pool1	chr17	+	Retained
MARCO	MARCO	NM_006770.3	Pool1	chr2	+	Retained
MASP1	MASP1	NM_001031849.2	Pool1	chr3	-	Retained
MASP1	MASP1	NM_001879.5	Pool1	chr3	-	Retained
MASP1	MASP1	NM_139125.3	Pool1	chr3	-	Retained
MASP1	MASP1	NR_033519.1	Pool1	chr3	-	Retained
MBL2	MBL2	NM_000242.2	Pool1	chr10	-	Filtered out
MC2R	MC2R	NM_000529.2	Pool1	chr18	-	Filtered out
MCP1	CCL2	NM_002982.3	Pool1	chr17	+	Retained
MDK	MDK	NM_001012333.2	Pool1	chr11	+	Retained
MDK	MDK	NM_001012334.2	Pool1	chr11	+	Retained
MDK	MDK	NM_001270550.1	Pool1	chr11	+	Retained
MDK	MDK	NM_001270551.1	Pool1	chr11	+	Retained
MDK	MDK	NM_001270552.1	Pool1	chr11	+	Retained
MDK	MDK	NM_002391.4	Pool1	chr11	+	Retained
MDK	MDK	NR_073039.1	Pool1	chr11	+	Retained
MEFV	MEFV	NM_000243.2	Pool1	chr16	-	Retained
MEFV	MEFV	NM_001198536.1	Pool1	chr16	-	Retained
MGLL	MGLL	NM_001003794.2	Pool1	chr3	-	Retained
MGLL	MGLL	NM_001256585.1	Pool1	chr3	-	Retained
MGLL	MGLL	NM_007283.6	Pool1	chr3	-	Retained
MGP	MGP	NM_000900.3	Pool1	chr12	-	Retained
MGP	MGP	NM_001190839.1	Pool1	chr12	-	Retained
MMP1	MMP1	NM_001145938.1	Pool1	chr11	-	Retained
MMP1	MMP1	NM_002421.3	Pool1	chr11	-	Retained
MMP11	MMP11	NM_005940.3	Pool1	chr22	+	Filtered out
MMP12	MMP12	NM_002426.4	Pool1	chr11	-	Retained
MMP13	MMP13	NM_002427.3	Pool1	chr11	-	Retained
MMP14	MMP14	NM_004995.2	Pool1	chr14	+	Retained
MMP15	MMP15	NM_002428.2	Pool1	chr16	+	Retained
MMP2	MMP2	NM_001127891.1	Pool1	chr16	+	Retained
MMP2	MMP2	NM_004530.4	Pool1	chr16	+	Retained
MMP25	MMP25	NM_022468.4	Pool1	chr16	+	Retained
MMP3	MMP3	NM_002422.3	Pool1	chr11	-	Retained
MMP9	MMP9	NM_004994.2	Pool1	chr20	+	Retained
MRC1	MRC1	NM_002438.2	Pool1	chr10	+	Retained
MSLN	MSLN	NM_001177355.1	Pool1	chr16	+	Retained
MSLN	MSLN	NM_005823.5	Pool1	chr16	+	Retained
MSLN	MSLN	NM_013404.4	Pool1	chr16	+	Retained
MSR1	MSR1	NM_002445.3	Pool1	chr8	-	Retained
MSR1	MSR1	NM_138715.2	Pool1	chr8	-	Retained
MSR1	MSR1	NM_138716.2	Pool1	chr8	-	Retained
MUC2	MUC2	NM_002457.2	Pool1	chr11	+	Retained
MUC4	MUC4	NM_004532.5	Pool1	chr3	-	Retained
MUC4	MUC4	NM_018406.6	Pool1	chr3	-	Retained
MUC4	MUC4	NM_138297.4	Pool1	chr3	-	Retained
MUC5	MUC5B	NM_002458.2	Pool1	chr11	+	Retained
MYC	MYC	NM_002467.4	Pool1	chr8	+	Retained
MYD88	MYD88	NM_001172566.1	Pool1	chr3	+	Retained
MYD88	MYD88	NM_001172567.1	Pool1	chr3	+	Retained
MYD88	MYD88	NM_001172568.1	Pool1	chr3	+	Retained
MYD88	MYD88	NM_001172569.1	Pool1	chr3	+	Retained
MYD88	MYD88	NM_002468.4	Pool1	chr3	+	Retained
MYH11	MYH11	NM_001040113.1	Pool1	chr16	-	Retained
MYH11	MYH11	NM_001040114.1	Pool1	chr16	-	Retained
MYH11	MYH11	NM_002474.2	Pool1	chr16	-	Retained
MYH11	MYH11	NM_022844.2	Pool1	chr16	-	Retained
MYL9	MYL9	NM_006097.4	Pool1	chr20	+	Retained
MYL9	MYL9	NM_181526.2	Pool1	chr20	+	Retained
NAMPT	NAMPT	NM_005746.2	Pool1	chr7	-	Retained
NAPSA	NAPSA	NM_004851.1	Pool1	chr19	-	Retained
NCAM1	NCAM1	NM_000615.6	Pool1	chr11	+	Retained
NCAM1	NCAM1	NM_001076682.3	Pool1	chr11	+	Retained
NCAM1	NCAM1	NM_001242607.1	Pool1	chr11	+	Retained
NCAM1	NCAM1	NM_001242608.1	Pool1	chr11	+	Retained
NCAM1	NCAM1	NM_181351.4	Pool1	chr11	+	Retained
NCOA1	NCOA1	NM_003743.4	Pool1	chr2	+	Retained
NCOA1	NCOA1	NM_147223.2	Pool1	chr2	+	Retained
NCOA1	NCOA1	NM_147233.2	Pool1	chr2	+	Retained
NCR3	NCR3	NM_001145466.1	Pool1	chr6	-	Retained
NCR3	NCR3	NM_001145467.1	Pool1	chr6	-	Retained
NCR3	NCR3	NM_147130.2	Pool1	chr6	-	Retained
NDST1	NDST1	NM_001543.4	Pool1	chr5	+	Retained
NEUROD1	NEUROD1	NM_002500.4	Pool1	chr2	-	Retained
NFAM1	NFAM1	NM_145912.5	Pool1	chr22	-	Retained
NFATC3	NFATC3	NM_004555.3	Pool1	chr16	+	Retained
NFATC3	NFATC3	NM_173163.2	Pool1	chr16	+	Retained
NFATC3	NFATC3	NM_173165.2	Pool1	chr16	+	Retained
NFATC4	NFATC4	NM_001136022.1	Pool1	chr14	+	Retained
NFATC4	NFATC4	NM_001198965.1	Pool1	chr14	+	Retained
NFATC4	NFATC4	NM_001198966.1	Pool1	chr14	+	Retained
NFATC4	NFATC4	NM_001198967.1	Pool1	chr14	+	Retained
NFATC4	NFATC4	NM_004554.4	Pool1	chr14	+	Retained
NFE2L1	NFE2L1	NM_003204.2	Pool1	chr17	+	Retained
NFKB1	NFKB1	NM_001165412.1	Pool1	chr4	+	Retained
NFKB1	NFKB1	NM_003998.3	Pool1	chr4	+	Retained
NFKBIA	NFKBIA	NM_020529.2	Pool1	chr14	-	Retained
NFKBIB	NFKBIB	NM_001243116.1	Pool1	chr19	+	Retained
NFKBIB	NFKBIB	NM_002503.4	Pool1	chr19	+	Retained
NFKBIB	NFKBIB	NR_040515.1	Pool1	chr19	+	Retained
NFRKB	NFRKB	NM_001143835.1	Pool1	chr11	-	Retained
NFRKB	NFRKB	NM_006165.3	Pool1	chr11	-	Retained
NFX1	NFX1	NM_002504.4	Pool1	chr9	+	Retained
NFX1	NFX1	NM_147133.2	Pool1	chr9	+	Retained
NFX1	NFX1	NM_147134.2	Pool1	chr9	+	Retained
NLK	NLK	NM_016231.4	Pool1	chr17	+	Retained
NLRP12	NLRP12	NM_033297.2	Pool1	chr19	-	Retained
NLRP12	NLRP12	NM_144687.2	Pool1	chr19	-	Retained
NLRP3	NLRP3	NM_001079821.2	Pool1	chr1	+	Retained
NLRP3	NLRP3	NM_001127461.2	Pool1	chr1	+	Retained
NLRP3	NLRP3	NM_001127462.2	Pool1	chr1	+	Retained
NLRP3	NLRP3	NM_001243133.1	Pool1	chr1	+	Retained
NLRP3	NLRP3	NM_004895.4	Pool1	chr1	+	Retained
NLRP3	NLRP3	NM_183395.2	Pool1	chr1	+	Retained
NMI	NMI	NM_004688.2	Pool1	chr2	-	Retained
NODAL	NODAL	NM_018055.4	Pool1	chr10	-	Filtered out
NOS2	NOS2	NM_000625.4	Pool1	chr17	-	Retained
NOX4	NOX4	NM_001143836.1	Pool1	chr11	-	Retained
NOX4	NOX4	NM_001143837.1	Pool1	chr11	-	Retained
NOX4	NOX4	NM_016931.3	Pool1	chr11	-	Retained
NOX4	NOX4	NR_026571.1	Pool1	chr11	-	Retained
NPY	NPY	NM_000905.3	Pool1	chr7	+	Retained
NR2F6	NR2F6	NM_005234.3	Pool1	chr19	-	Retained
NR3C1	NR3C1	NM_000176.2	Pool1	chr5	-	Retained
NR3C1	NR3C1	NM_001018074.1	Pool1	chr5	-	Retained
NR3C1	NR3C1	NM_001018075.1	Pool1	chr5	-	Retained
NR3C1	NR3C1	NM_001018076.1	Pool1	chr5	-	Retained
NR3C1	NR3C1	NM_001018077.1	Pool1	chr5	-	Retained
NR3C1	NR3C1	NM_001020825.1	Pool1	chr5	-	Retained
NR3C1	NR3C1	NM_001024094.1	Pool1	chr5	-	Retained
NR3C1	NR3C1	NM_001204258.1	Pool1	chr5	-	Retained
NR3C1	NR3C1	NM_001204259.1	Pool1	chr5	-	Retained
NR3C1	NR3C1	NM_001204260.1	Pool1	chr5	-	Retained
NR3C1	NR3C1	NM_001204261.1	Pool1	chr5	-	Retained
NR3C1	NR3C1	NM_001204262.1	Pool1	chr5	-	Retained
NR3C1	NR3C1	NM_001204263.1	Pool1	chr5	-	Retained
NR3C1	NR3C1	NM_001204264.1	Pool1	chr5	-	Retained
NR3C1	NR3C1	NM_001204265.1	Pool1	chr5	-	Retained
NRG1	NRG1	NM_001159995.1	Pool1	chr8	+	Retained
NRG1	NRG1	NM_001159999.1	Pool1	chr8	+	Retained
NRG1	NRG1	NM_001160001.1	Pool1	chr8	+	Retained
NRG1	NRG1	NM_001160002.1	Pool1	chr8	+	Retained
NRG1	NRG1	NM_001160004.1	Pool1	chr8	+	Retained
NRG1	NRG1	NM_001160005.1	Pool1	chr8	+	Retained
NRG1	NRG1	NM_001160007.1	Pool1	chr8	+	Retained
NRG1	NRG1	NM_001160008.1	Pool1	chr8	+	Retained
NRG1	NRG1	NM_004495.3	Pool1	chr8	+	Retained
NRG1	NRG1	NM_013956.3	Pool1	chr8	+	Retained
NRG1	NRG1	NM_013957.3	Pool1	chr8	+	Retained
NRG1	NRG1	NM_013958.3	Pool1	chr8	+	Retained
NRG1	NRG1	NM_013960.3	Pool1	chr8	+	Retained
NRG1	NRG1	NM_013962.2	Pool1	chr8	+	Retained
NRG1	NRG1	NM_013964.3	Pool1	chr8	+	Retained
NUP85	NUP85	NM_024844.3	Pool1	chr17	+	Retained
OBP2A	OBP2A	NM_014582.2	Pool1	chr9	+	Retained
OBP2B	OBP2B	NM_014581.2	Pool1	chr9	-	Retained
OLFM4	OLFM4	NM_006418.4	Pool1	chr13	+	Retained
OLR1	OLR1	NM_001172632.1	Pool1	chr12	-	Retained
OLR1	OLR1	NM_001172633.1	Pool1	chr12	-	Retained
OLR1	OLR1	NM_002543.3	Pool1	chr12	-	Retained
OMP	OMP	NM_006189.1	Pool1	chr11	+	Retained
ORM1	ORM1	NM_000607.2	Pool1	chr9	+	Retained
ORM2	ORM2	NM_000608.2	Pool1	chr9	+	Retained
OSM	OSM	NM_020530.4	Pool1	chr22	-	Retained
P2RX7	P2RX7	NM_002562.5	Pool1	chr12	+	Retained
P2RX7	P2RX7	NR_033948.1	Pool1	chr12	+	Retained
P2RX7	P2RX7	NR_033949.1	Pool1	chr12	+	Retained
P2RX7	P2RX7	NR_033950.1	Pool1	chr12	+	Retained
P2RX7	P2RX7	NR_033951.1	Pool1	chr12	+	Retained
P2RX7	P2RX7	NR_033952.1	Pool1	chr12	+	Retained
P2RX7	P2RX7	NR_033953.1	Pool1	chr12	+	Retained
P2RX7	P2RX7	NR_033954.1	Pool1	chr12	+	Retained
P2RX7	P2RX7	NR_033955.1	Pool1	chr12	+	Retained
P2RX7	P2RX7	NR_033956.1	Pool1	chr12	+	Retained
PARP4	PARP4	NM_006437.3	Pool1	chr13	-	Retained
PDE4A	PDE4A	NM_001111307.1	Pool1	chr19	+	Retained
PDE4A	PDE4A	NM_001111308.1	Pool1	chr19	+	Retained
PDE4A	PDE4A	NM_001111309.1	Pool1	chr19	+	Retained
PDE4A	PDE4A	NM_001243121.1	Pool1	chr19	+	Retained
PDE4A	PDE4A	NM_006202.2	Pool1	chr19	+	Retained
PDE4B	PDE4B	NM_001037339.1	Pool1	chr1	+	Retained
PDE4B	PDE4B	NM_001037340.1	Pool1	chr1	+	Retained
PDE4B	PDE4B	NM_001037341.1	Pool1	chr1	+	Retained
PDE4B	PDE4B	NM_002600.3	Pool1	chr1	+	Retained
PDE4C	PDE4C	NM_000923.4	Pool1	chr19	-	Retained
PDE4C	PDE4C	NM_001098818.2	Pool1	chr19	-	Retained
PDE4C	PDE4C	NM_001098819.2	Pool1	chr19	-	Retained
PDE4C	PDE4C	NR_040546.1	Pool1	chr19	-	Retained
PDE4D	PDE4D	NM_001104631.1	Pool1	chr5	-	Retained
PDE4D	PDE4D	NM_001165899.1	Pool1	chr5	-	Retained
PDE4D	PDE4D	NM_001197218.1	Pool1	chr5	-	Retained
PDE4D	PDE4D	NM_001197219.1	Pool1	chr5	-	Retained
PDE4D	PDE4D	NM_001197220.1	Pool1	chr5	-	Retained
PDE4D	PDE4D	NM_001197221.1	Pool1	chr5	-	Retained
PDE4D	PDE4D	NM_001197222.1	Pool1	chr5	-	Retained
PDE4D	PDE4D	NM_001197223.1	Pool1	chr5	-	Retained
PDE4D	PDE4D	NM_006203.4	Pool1	chr5	-	Retained
PDGFA	PDGFA	NM_002607.5	Pool1	chr7	-	Retained
PDGFA	PDGFA	NM_033023.4	Pool1	chr7	-	Retained
PDGFB	PDGFB	NM_002608.2	Pool1	chr22	-	Retained
PDGFB	PDGFB	NM_033016.2	Pool1	chr22	-	Retained
PDGFC	PDGFC	NM_016205.2	Pool1	chr4	-	Retained
PDGFC	PDGFC	NR_036641.1	Pool1	chr4	-	Retained
PDGFD	PDGFD	NM_025208.4	Pool1	chr11	-	Retained
PDGFD	PDGFD	NM_033135.3	Pool1	chr11	-	Retained
PDGFRA	PDGFRA	NM_006206.4	Pool1	chr4	+	Retained
PDGFRB	PDGFRB	NM_002609.3	Pool1	chr5	-	Retained
PECAM1	PECAM1	NM_000442.4	Pool1	chr17	-	Retained
PELI1	PELI1	NM_020651.3	Pool1	chr2	-	Retained
PELI2	PELI2	NM_021255.2	Pool1	chr14	+	Retained
PGLYRP1	PGLYRP1	NM_005091.2	Pool1	chr19	-	Retained
PIFO	PIFO	NM_181643.4	Pool1	chr1	+	Retained
PIK3CA	PIK3CA	NM_006218.2	Pool1	chr3	+	Retained
PIK3CD	PIK3CD	NM_005026.3	Pool1	chr1	+	Retained
PIK3CG	PIK3CG	NM_002649.2	Pool1	chr7	+	Retained
PIK3R1	PIK3R1	NM_001242466.1	Pool1	chr5	+	Retained
PIK3R1	PIK3R1	NM_181504.3	Pool1	chr5	+	Retained
PIK3R1	PIK3R1	NM_181523.2	Pool1	chr5	+	Retained
PIK3R1	PIK3R1	NM_181524.1	Pool1	chr5	+	Retained
PIK3R2	PIK3R2	NM_005027.2	Pool1	chr19	+	Retained
PLA2G2D	PLA2G2D	NM_012400.2	Pool1	chr1	-	Retained
PLA2G2E	PLA2G2E	NM_014589.1	Pool1	chr1	-	Filtered out
PLA2G4C	PLA2G4C	NM_001159322.1	Pool1	chr19	-	Retained
PLA2G4C	PLA2G4C	NM_001159323.1	Pool1	chr19	-	Retained
PLA2G4C	PLA2G4C	NM_003706.2	Pool1	chr19	-	Retained
PLA2G5	PLA2G5	NM_000929.2	Pool1	chr1	+	Filtered out
PLA2G7	PLA2G7	NM_001168357.1	Pool1	chr6	-	Retained
PLA2G7	PLA2G7	NM_005084.3	Pool1	chr6	-	Retained
PLCB2	PLCB2	NM_004573.2	Pool1	chr15	-	Retained
PLCB3	PLCB3	NM_000932.2	Pool1	chr11	+	Retained
PLCB3	PLCB3	NM_001184883.1	Pool1	chr11	+	Retained
PLCB4	PLCB4	NM_000933.3	Pool1	chr20	+	Retained
PLCB4	PLCB4	NM_001172646.1	Pool1	chr20	+	Retained
PLCB4	PLCB4	NM_182797.2	Pool1	chr20	+	Retained
PLCD1	PLCD1	NM_001130964.1	Pool1	chr3	-	Retained
PLCD1	PLCD1	NM_006225.3	Pool1	chr3	-	Retained
PLCD1	PLCD1	NR_024071.1	Pool1	chr3	-	Retained
PLCG1	PLCG1	NM_002660.2	Pool1	chr20	+	Retained
PLCG1	PLCG1	NM_182811.1	Pool1	chr20	+	Retained
PLCG2	PLCG2	NM_002661.3	Pool1	chr16	+	Retained
PLP1	PLP1	NM_000533.3	Pool1	chrX	+	Retained
PLP1	PLP1	NM_001128834.1	Pool1	chrX	+	Retained
PLP1	PLP1	NM_199478.1	Pool1	chrX	+	Retained
PLP2	PLP2	NM_002668.2	Pool1	chrX	+	Retained
PODXL	PODXL	NM_001018111.2	Pool1	chr7	-	Retained
PODXL	PODXL	NM_005397.3	Pool1	chr7	-	Retained
PPARG	PPARG	NM_005037.5	Pool1	chr3	+	Retained
PPARG	PPARG	NM_015869.4	Pool1	chr3	+	Retained
PPARG	PPARG	NM_138711.3	Pool1	chr3	+	Retained
PPARG	PPARG	NM_138712.3	Pool1	chr3	+	Retained
PPBP	PPBP	NM_002704.3	Pool1	chr4	-	Retained
PPIA	PPIA	NM_021130.3	Pool1	chr7	+	Retained
PRDM1	PRDM1	NM_001198.3	Pool1	chr6	+	Retained
PRDM1	PRDM1	NM_182907.2	Pool1	chr6	+	Retained
PRDX5	PRDX5	NM_012094.4	Pool1	chr11	+	Retained
PRDX5	PRDX5	NM_181651.2	Pool1	chr11	+	Retained
PRDX5	PRDX5	NM_181652.2	Pool1	chr11	+	Retained
PRG2	PRG2	NM_001243245.1	Pool1	chr11	-	Retained
PRG2	PRG2	NM_002728.4	Pool1	chr11	-	Retained
PRKACA	PRKACA	NM_002730.3	Pool1	chr19	-	Retained
PRKACA	PRKACA	NM_207518.1	Pool1	chr19	-	Retained
PRKCA	PRKCA	NM_002737.2	Pool1	chr17	+	Retained
PRKCD	PRKCD	NM_006254.3	Pool1	chr3	+	Retained
PRKCD	PRKCD	NM_212539.1	Pool1	chr3	+	Retained
PRKCZ	PRKCZ	NM_001033581.1	Pool1	chr1	+	Retained
PRKCZ	PRKCZ	NM_001033582.1	Pool1	chr1	+	Retained
PRKCZ	PRKCZ	NM_001242874.1	Pool1	chr1	+	Retained
PRKCZ	PRKCZ	NM_002744.4	Pool1	chr1	+	Retained
PROCR	PROCR	NM_006404.3	Pool1	chr20	+	Retained
PROK2	PROK2	NM_001126128.1	Pool1	chr3	-	Retained
PROK2	PROK2	NM_021935.3	Pool1	chr3	-	Retained
PRTN3	PRTN3	NM_002777.3	Pool1	chr19	+	Retained
PTEN	PTEN	NM_000314.4	Pool1	chr10	+	Retained
PTGES	PTGES	NM_004878.4	Pool1	chr9	-	Retained
PTGFR	PTGFR	NM_000959.3	Pool1	chr1	+	Retained
PTGFR	PTGFR	NM_001039585.1	Pool1	chr1	+	Retained
PTGIS	PTGIS	NM_000961.3	Pool1	chr20	-	Filtered out
PTGS1	PTGS1	NM_000962.3	Pool1	chr9	+	Retained
PTGS1	PTGS1	NM_001271164.1	Pool1	chr9	+	Retained
PTGS1	PTGS1	NM_001271165.1	Pool1	chr9	+	Retained
PTGS1	PTGS1	NM_001271166.1	Pool1	chr9	+	Retained
PTGS1	PTGS1	NM_001271367.1	Pool1	chr9	+	Retained
PTGS1	PTGS1	NM_001271368.1	Pool1	chr9	+	Retained
PTGS1	PTGS1	NM_080591.2	Pool1	chr9	+	Retained
PTGS1	PTGS1	NR_073145.1	Pool1	chr9	+	Retained
PTGS1	PTGS1	NR_073146.1	Pool1	chr9	+	Retained
PTGS2	PTGS2	NM_000963.2	Pool1	chr1	-	Retained
PTK2B	PTK2B	NM_004103.4	Pool1	chr8	+	Retained
PTK2B	PTK2B	NM_173174.2	Pool1	chr8	+	Retained
PTK2B	PTK2B	NM_173175.2	Pool1	chr8	+	Retained
PTK2B	PTK2B	NM_173176.2	Pool1	chr8	+	Retained
PTN	PTN	NM_002825.5	Pool1	chr7	-	Retained
PTPN11	PTPN11	NM_002834.3	Pool1	chr12	+	Retained
PTPN11	PTPN11	NM_080601.1	Pool1	chr12	+	Retained
PTPN6	PTPN6	NM_002831.5	Pool1	chr12	+	Retained
PTPN6	PTPN6	NM_080548.4	Pool1	chr12	+	Retained
PTPN6	PTPN6	NM_080549.3	Pool1	chr12	+	Retained
PTPRC	PTPRC	NM_001267798.1	Pool1	chr1	+	Retained
PTPRC	PTPRC	NM_002838.4	Pool1	chr1	+	Retained
PTPRC	PTPRC	NM_080921.3	Pool1	chr1	+	Retained
PTPRC	PTPRC	NR_052021.1	Pool1	chr1	+	Retained
PTX3	PTX3	NM_002852.3	Pool1	chr3	+	Retained
PXMP2	PXMP2	NM_018663.1	Pool1	chr12	+	Retained
PYCARD	PYCARD	NM_013258.4	Pool1	chr16	-	Retained
PYDC1	PYDC1	NM_152901.2	Pool1	chr16	-	Filtered out
RAC1	RAC1	NM_006908.4	Pool1	chr7	+	Retained
RAC1	RAC1	NM_018890.3	Pool1	chr7	+	Retained
RAF1	RAF1	NM_002880.3	Pool1	chr3	-	Retained
RAPGEF1	RAPGEF1	NM_005312.2	Pool1	chr9	-	Retained
RAPGEF1	RAPGEF1	NM_198679.1	Pool1	chr9	-	Retained
RBM24	RBM24	NM_001143941.1	Pool1	chr6	+	Retained
RBM24	RBM24	NM_001143942.1	Pool1	chr6	+	Retained
RBM24	RBM24	NM_153020.2	Pool1	chr6	+	Retained
RBM4	RBM4	NM_001198843.1	Pool1	chr11	+	Retained
RBM4	RBM4	NM_001198844.1	Pool1	chr11	+	Retained
RBM4	RBM4	NM_002896.3	Pool1	chr11	+	Retained
RCAN1	RCAN1	NM_004414.5	Pool1	chr21	-	Retained
RCAN1	RCAN1	NM_203417.1	Pool1	chr21	-	Retained
RCAN1	RCAN1	NM_203418.1	Pool1	chr21	-	Retained
REG1A	REG1A	NM_002909.4	Pool1	chr2	+	Filtered out
REG3G	REG3G	NM_001008387.2	Pool1	chr2	+	Filtered out
REG3G	REG3G	NM_001270040.1	Pool1	chr2	+	Filtered out
REG3G	REG3G	NM_198448.3	Pool1	chr2	+	Filtered out
REL	REL	NM_002908.2	Pool1	chr2	+	Retained
RELA	RELA	NM_001145138.1	Pool1	chr11	-	Retained
RELA	RELA	NM_001243984.1	Pool1	chr11	-	Retained
RELA	RELA	NM_001243985.1	Pool1	chr11	-	Retained
RELA	RELA	NM_021975.3	Pool1	chr11	-	Retained
RETN	RETN	NM_001193374.1	Pool1	chr19	+	Retained
RETN	RETN	NM_020415.3	Pool1	chr19	+	Retained
RHOA	RHOA	NM_001664.2	Pool1	chr3	-	Retained
RIPK2	RIPK2	NM_003821.5	Pool1	chr8	+	Retained
RORA	RORA	NM_002943.3	Pool1	chr15	-	Retained
RORA	RORA	NM_134260.2	Pool1	chr15	-	Retained
RORA	RORA	NM_134261.2	Pool1	chr15	-	Retained
RORA	RORA	NM_134262.2	Pool1	chr15	-	Retained
RPS6	RPS6	NM_001010.2	Pool1	chr9	-	Retained
RPS6KA1	RPS6KA1	NM_001006665.1	Pool1	chr1	+	Retained
RPS6KA1	RPS6KA1	NM_002953.3	Pool1	chr1	+	Retained
RPS6KB1	RPS6KB1	NM_003161.2	Pool1	chr17	+	Retained
RPS6KB2	RPS6KB2	NM_003952.2	Pool1	chr11	+	Retained
RYR1	RYR1	NM_000540.2	Pool1	chr19	+	Retained
RYR1	RYR1	NM_001042723.1	Pool1	chr19	+	Retained
S100A12	S100A12	NM_005621.1	Pool1	chr1	-	Retained
S100A8	S100A8	NM_002964.4	Pool1	chr1	-	Retained
S100A9	S100A9	NM_002965.3	Pool1	chr1	+	Retained
S100B	S100B	NM_006272.2	Pool1	chr21	-	Retained
SAA4	SAA4	NM_006512.3	Pool1	chr11	-	Retained
SAAL1	SAAL1	NM_138421.2	Pool1	chr11	-	Retained
SCGB1A1	SCGB1A1	NM_003357.4	Pool1	chr11	+	Retained
SCGB1C1	SCGB1C1	NM_145651.2	Pool1	chr11	+	Retained
SCGB3A1	SCGB3A1	NM_052863.2	Pool1	chr5	-	Retained
SCUBE1	SCUBE1	NM_173050.3	Pool1	chr22	-	Retained
SDCBP	SDCBP	NM_001007067.1	Pool1	chr8	+	Retained
SDCBP	SDCBP	NM_001007068.1	Pool1	chr8	+	Retained
SDCBP	SDCBP	NM_001007069.1	Pool1	chr8	+	Retained
SDCBP	SDCBP	NM_001007070.1	Pool1	chr8	+	Retained
SDCBP	SDCBP	NM_005625.3	Pool1	chr8	+	Retained
SECTM1	SECTM1	NM_003004.2	Pool1	chr17	-	Retained
SELE	SELE	NM_000450.2	Pool1	chr1	-	Filtered out
SELENBP1	SELENBP1	NM_001258288.1	Pool1	chr1	-	Retained
SELENBP1	SELENBP1	NM_001258289.1	Pool1	chr1	-	Retained
SELENBP1	SELENBP1	NM_003944.3	Pool1	chr1	-	Retained
SERPINA1	SERPINA1	NM_000295.4	Pool1	chr14	-	Retained
SERPINA1	SERPINA1	NM_001002235.2	Pool1	chr14	-	Retained
SERPINA1	SERPINA1	NM_001002236.2	Pool1	chr14	-	Retained
SERPINA1	SERPINA1	NM_001127700.1	Pool1	chr14	-	Retained
SERPINA1	SERPINA1	NM_001127701.1	Pool1	chr14	-	Retained
SERPINA1	SERPINA1	NM_001127702.1	Pool1	chr14	-	Retained
SERPINA1	SERPINA1	NM_001127703.1	Pool1	chr14	-	Retained
SERPINA1	SERPINA1	NM_001127704.1	Pool1	chr14	-	Retained
SERPINA1	SERPINA1	NM_001127705.1	Pool1	chr14	-	Retained
SERPINA1	SERPINA1	NM_001127706.1	Pool1	chr14	-	Retained
SERPINA1	SERPINA1	NM_001127707.1	Pool1	chr14	-	Retained
SERPINA3	SERPINA3	NM_001085.4	Pool1	chr14	+	Retained
SERPINB3	SERPINB3	NM_006919.2	Pool1	chr18	-	Retained
SERPING1	SERPING1	NM_000062.2	Pool1	chr11	+	Retained
SERPING1	SERPING1	NM_001032295.1	Pool1	chr11	+	Retained
SFTPA2	SFTPA2	NM_001098668.2	Pool1	chr10	-	Filtered out
SFTPB	SFTPB	NM_000542.3	Pool1	chr2	-	Filtered out
SFTPB	SFTPB	NM_198843.2	Pool1	chr2	-	Filtered out
SH2B2	SH2B2	NM_020979.3	Pool1	chr7	+	Retained
SHC1	SHC1	NM_001130040.1	Pool1	chr1	-	Retained
SHC1	SHC1	NM_001130041.1	Pool1	chr1	-	Retained
SHC1	SHC1	NM_001202859.1	Pool1	chr1	-	Retained
SHC1	SHC1	NM_003029.4	Pool1	chr1	-	Retained
SHC1	SHC1	NM_183001.4	Pool1	chr1	-	Retained
SHH	SHH	NM_000193.2	Pool1	chr7	-	Filtered out
SIGIRR	SIGIRR	NM_001135053.1	Pool1	chr11	-	Retained
SIGIRR	SIGIRR	NM_001135054.1	Pool1	chr11	-	Retained
SIGIRR	SIGIRR	NM_021805.2	Pool1	chr11	-	Retained
SIGLEC1	SIGLEC1	NM_023068.3	Pool1	chr20	-	Retained
SIVA1	SIVA1	NM_006427.3	Pool1	chr14	+	Retained
SIVA1	SIVA1	NM_021709.2	Pool1	chr14	+	Retained
SLC7A5	SLC7A5	NM_003486.5	Pool1	chr16	-	Retained
SLPI	SLPI	NM_003064.2	Pool1	chr20	-	Retained
SLURP1	SLURP1	NM_020427.2	Pool1	chr8	-	Retained
SOCS2	SOCS2	NM_003877.4	Pool1	chr12	+	Retained
SOCS3	SOCS3	NM_003955.3	Pool1	chr17	-	Retained
SOCS5	SOCS5	NM_014011.4	Pool1	chr2	+	Retained
SOD1	SOD1	NM_000454.4	Pool1	chr21	+	Retained
SOS1	SOS1	NM_005633.3	Pool1	chr2	-	Retained
SOX11	SOX11	NM_003108.3	Pool1	chr2	+	Retained
SP1	SP1	NM_001251825.1	Pool1	chr12	+	Retained
SP1	SP1	NM_003109.1	Pool1	chr12	+	Retained
SP1	SP1	NM_138473.2	Pool1	chr12	+	Retained
SPINK1	SPINK1	NM_003122.3	Pool1	chr5	-	Retained
SPINK4	SPINK4	NM_014471.1	Pool1	chr9	+	Retained
SPN	SPN	NM_001030288.2	Pool1	chr16	+	Retained
SPP1	SPP1	NM_000582.2	Pool1	chr4	+	Retained
SPP1	SPP1	NM_001040058.1	Pool1	chr4	+	Retained
SPP1	SPP1	NM_001040060.1	Pool1	chr4	+	Retained
SPP1	SPP1	NM_001251829.1	Pool1	chr4	+	Retained
SPP1	SPP1	NM_001251830.1	Pool1	chr4	+	Retained
SPRED1	SPRED1	NM_152594.2	Pool1	chr15	+	Retained
SPRED2	SPRED2	NM_001128210.1	Pool1	chr2	-	Retained
SPRED2	SPRED2	NM_181784.2	Pool1	chr2	-	Retained
SQSTM1	SQSTM1	NM_001142298.1	Pool1	chr5	+	Retained
SQSTM1	SQSTM1	NM_001142299.1	Pool1	chr5	+	Retained
SQSTM1	SQSTM1	NM_003900.4	Pool1	chr5	+	Retained
SRC	SRC	NM_005417.3	Pool1	chr20	+	Retained
SRC	SRC	NM_198291.1	Pool1	chr20	+	Retained
STAB1	STAB1	NM_015136.2	Pool1	chr3	+	Retained
STAT1	STAT1	NM_007315.3	Pool1	chr2	-	Retained
STAT1	STAT1	NM_139266.2	Pool1	chr2	-	Retained
STAT3	STAT3	NM_003150.3	Pool1	chr17	-	Retained
STAT3	STAT3	NM_139276.2	Pool1	chr17	-	Retained
STAT3	STAT3	NM_213662.1	Pool1	chr17	-	Retained
STAT4	STAT4	NM_001243835.1	Pool1	chr2	-	Retained
STAT4	STAT4	NM_003151.3	Pool1	chr2	-	Retained
STAT5A	STAT5A	NM_003152.3	Pool1	chr17	+	Retained
STAT5B	STAT5B	NM_012448.3	Pool1	chr17	-	Retained
STAT6	STAT6	NM_001178078.1	Pool1	chr12	-	Retained
STAT6	STAT6	NM_001178079.1	Pool1	chr12	-	Retained
STAT6	STAT6	NM_001178080.1	Pool1	chr12	-	Retained
STAT6	STAT6	NM_001178081.1	Pool1	chr12	-	Retained
STAT6	STAT6	NM_003153.4	Pool1	chr12	-	Retained
STAT6	STAT6	NR_033659.1	Pool1	chr12	-	Retained
SYK	SYK	NM_001135052.2	Pool1	chr9	+	Retained
SYK	SYK	NM_001174167.1	Pool1	chr9	+	Retained
SYK	SYK	NM_001174168.1	Pool1	chr9	+	Retained
SYK	SYK	NM_003177.5	Pool1	chr9	+	Retained
TAB1	TAB1	NM_006116.2	Pool1	chr22	+	Retained
TAB1	TAB1	NM_153497.2	Pool1	chr22	+	Retained
TAB2	TAB2	NM_015093.4	Pool1	chr6	+	Retained
TAB3	TAB3	NM_152787.3	Pool1	chrX	-	Retained
TACR1	TACR1	NM_001058.3	Pool1	chr2	-	Retained
TACR1	TACR1	NM_015727.2	Pool1	chr2	-	Retained
TBP	TBP	NM_001172085.1	Pool1	chr6	+	Retained
TBP	TBP	NM_003194.4	Pool1	chr6	+	Retained
TBXAS1	TBXAS1	NM_001061.4	Pool1	chr7	+	Retained
TBXAS1	TBXAS1	NM_001130966.2	Pool1	chr7	+	Retained
TBXAS1	TBXAS1	NM_001166253.1	Pool1	chr7	+	Retained
TBXAS1	TBXAS1	NM_001166254.1	Pool1	chr7	+	Retained
TBXAS1	TBXAS1	NM_030984.3	Pool1	chr7	+	Retained
TBXAS1	TBXAS1	NR_029394.1	Pool1	chr7	+	Retained
TF	TF	NM_001063.3	Pool1	chr3	+	Retained
TFF3	TFF3	NM_003226.3	Pool1	chr21	-	Retained
TGFB1	TGFB1	NM_000660.4	Pool1	chr19	-	Retained
TGFB2	TGFB2	NM_001135599.2	Pool1	chr1	+	Retained
TGFB2	TGFB2	NM_003238.3	Pool1	chr1	+	Retained
TGM2	TGM2	NM_004613.2	Pool1	chr20	-	Retained
TGM2	TGM2	NM_198951.1	Pool1	chr20	-	Retained
THBS1	THBS1	NM_003246.2	Pool1	chr15	+	Retained
THBS3	THBS3	NM_001252607.1	Pool1	chr1	-	Retained
THBS3	THBS3	NM_001252608.1	Pool1	chr1	-	Retained
THBS3	THBS3	NM_007112.4	Pool1	chr1	-	Retained
THBS3	THBS3	NR_045553.1	Pool1	chr1	-	Retained
TIMP1	TIMP1	NM_003254.2	Pool1	chrX	+	Retained
TIMP2	TIMP2	NM_003255.4	Pool1	chr17	-	Retained
TIRAP	TIRAP	NM_001039661.1	Pool1	chr11	+	Retained
TIRAP	TIRAP	NM_148910.2	Pool1	chr11	+	Retained
TLR1	TLR1	NM_003263.3	Pool1	chr4	-	Retained
TLR10	TLR10	NM_001017388.2	Pool1	chr4	-	Retained
TLR10	TLR10	NM_001195106.1	Pool1	chr4	-	Retained
TLR10	TLR10	NM_001195107.1	Pool1	chr4	-	Retained
TLR10	TLR10	NM_030956.3	Pool1	chr4	-	Retained
TLR2	TLR2	NM_003264.3	Pool1	chr4	+	Retained
TLR3	TLR3	NM_003265.2	Pool1	chr4	+	Retained
TLR4	TLR4	NM_003266.3	Pool1	chr9	+	Retained
TLR4	TLR4	NM_138554.4	Pool1	chr9	+	Retained
TLR5	TLR5	NM_003268.5	Pool1	chr1	-	Retained
TLR6	TLR6	NM_006068.4	Pool1	chr4	-	Retained
TLR7	TLR7	NM_016562.3	Pool1	chrX	+	Retained
TMPRSS2	TMPRSS2	NM_001135099.1	Pool1	chr21	-	Retained
TMPRSS2	TMPRSS2	NM_005656.3	Pool1	chr21	-	Retained
TMSB4X	TMSB4X	NM_021109.3	Pool1	chrX	+	Retained
TNC	TNC	NM_002160.3	Pool1	chr9	-	Retained
TNFAIP3	TNFAIP3	NM_001270507.1	Pool1	chr6	+	Retained
TNFAIP3	TNFAIP3	NM_001270508.1	Pool1	chr6	+	Retained
TNFAIP3	TNFAIP3	NM_006290.3	Pool1	chr6	+	Retained
TNFAIP6	TNFAIP6	NM_007115.3	Pool1	chr2	+	Retained
TNF-alpha	TNF	NM_000594.3	Pool1	chr6	+	Retained
TNFRSF11B	TNFRSF11B	NM_002546.3	Pool1	chr8	-	Retained
TNFRSF14	TNFRSF14	NM_003820.2	Pool1	chr1	+	Retained
TNFRSF18	TNFRSF18	NM_004195.2	Pool1	chr1	-	Retained
TNFRSF18	TNFRSF18	NM_148901.1	Pool1	chr1	-	Retained
TNFRSF18	TNFRSF18	NM_148902.1	Pool1	chr1	-	Retained
TNFRSF19	TNFRSF19	NM_001204458.1	Pool1	chr13	+	Retained
TNFRSF19	TNFRSF19	NM_001204459.1	Pool1	chr13	+	Retained
TNFRSF19	TNFRSF19	NM_018647.3	Pool1	chr13	+	Retained
TNFRSF19	TNFRSF19	NM_148957.3	Pool1	chr13	+	Retained
TNFRSF1A	TNFRSF1A	NM_001065.3	Pool1	chr12	-	Retained
TNFRSF1B	TNFRSF1B	NM_001066.2	Pool1	chr1	+	Retained
TNFRSF25	TNFRSF25	NM_001039664.1	Pool1	chr1	-	Retained
TNFRSF25	TNFRSF25	NM_003790.2	Pool1	chr1	-	Retained
TNFRSF25	TNFRSF25	NM_148965.1	Pool1	chr1	-	Retained
TNFRSF25	TNFRSF25	NM_148966.1	Pool1	chr1	-	Retained
TNFRSF25	TNFRSF25	NM_148967.1	Pool1	chr1	-	Retained
TNFRSF25	TNFRSF25	NM_148970.1	Pool1	chr1	-	Retained
TNFRSF4	TNFRSF4	NM_003327.3	Pool1	chr1	-	Retained
TNFRSF9	TNFRSF9	NM_001561.5	Pool1	chr1	-	Retained
TNFSF10	TNFSF10	NM_001190942.1	Pool1	chr3	-	Retained
TNFSF10	TNFSF10	NM_003810.3	Pool1	chr3	-	Retained
TNFSF10	TNFSF10	NR_033994.1	Pool1	chr3	-	Retained
TNFSF11	TNFSF11	NM_003701.3	Pool1	chr13	+	Filtered out
TNFSF11	TNFSF11	NM_033012.3	Pool1	chr13	+	Filtered out
TNFSF12	TNFSF12	NM_003809.2	Pool1	chr17	+	Retained
TNFSF12	TNFSF12	NR_037146.1	Pool1	chr17	+	Retained
TNFSF13	TNFSF13	NM_001198622.1	Pool1	chr17	+	Retained
TNFSF13	TNFSF13	NM_001198623.1	Pool1	chr17	+	Retained
TNFSF13	TNFSF13	NM_001198624.1	Pool1	chr17	+	Retained
TNFSF13	TNFSF13	NM_003808.3	Pool1	chr17	+	Retained
TNFSF13	TNFSF13	NM_172087.2	Pool1	chr17	+	Retained
TNFSF13	TNFSF13	NM_172088.2	Pool1	chr17	+	Retained
TNFSF13B	TNFSF13B	NM_001145645.2	Pool1	chr13	+	Retained
TNFSF13B	TNFSF13B	NM_006573.4	Pool1	chr13	+	Retained
TNFSF14	TNFSF14	NM_003807.3	Pool1	chr19	-	Filtered out
TNFSF14	TNFSF14	NM_172014.2	Pool1	chr19	-	Filtered out
TNFSF15	TNFSF15	NM_001204344.1	Pool1	chr9	-	Retained
TNFSF15	TNFSF15	NM_005118.3	Pool1	chr9	-	Retained
TNFSF18	TNFSF18	NM_005092.3	Pool1	chr1	-	Retained
TNFSF4	TNFSF4	NM_003326.3	Pool1	chr1	-	Retained
TNFSF8	TNFSF8	NM_001244.3	Pool1	chr9	-	Retained
TNFSF8	TNFSF8	NM_001252290.1	Pool1	chr9	-	Retained
TNFSF9	TNFSF9	NM_003811.3	Pool1	chr19	+	Retained
TOLLIP	TOLLIP	NM_019009.3	Pool1	chr11	-	Retained
TP53	TP53	NM_000546.5	Pool1	chr17	-	Retained
TP53	TP53	NM_001126112.2	Pool1	chr17	-	Retained
TP53	TP53	NM_001126113.2	Pool1	chr17	-	Retained
TP53	TP53	NM_001126114.2	Pool1	chr17	-	Retained
TP53	TP53	NM_001126115.1	Pool1	chr17	-	Retained
TP53	TP53	NM_001126116.1	Pool1	chr17	-	Retained
TP53	TP53	NM_001126117.1	Pool1	chr17	-	Retained
TP53	TP53	NM_001126118.1	Pool1	chr17	-	Retained
TP63	TP63	NM_001114978.1	Pool1	chr3	+	Retained
TP63	TP63	NM_001114979.1	Pool1	chr3	+	Retained
TP63	TP63	NM_001114980.1	Pool1	chr3	+	Retained
TP63	TP63	NM_001114981.1	Pool1	chr3	+	Retained
TP63	TP63	NM_001114982.1	Pool1	chr3	+	Retained
TP63	TP63	NM_003722.4	Pool1	chr3	+	Retained
TPST1	TPST1	NM_003596.3	Pool1	chr7	+	Retained
TRAF3	TRAF3	NM_001199427.1	Pool1	chr14	+	Retained
TRAF3	TRAF3	NM_003300.3	Pool1	chr14	+	Retained
TRAF3	TRAF3	NM_145725.2	Pool1	chr14	+	Retained
TRAF3	TRAF3	NM_145726.2	Pool1	chr14	+	Retained
TRAF3IP2	TRAF3IP2	NM_001164281.2	Pool1	chr6	-	Retained
TRAF3IP2	TRAF3IP2	NM_001164283.2	Pool1	chr6	-	Retained
TRAF3IP2	TRAF3IP2	NM_147686.3	Pool1	chr6	-	Retained
TRAF3IP2	TRAF3IP2	NR_028338.2	Pool1	chr6	-	Retained
TRAF6	TRAF6	NM_004620.3	Pool1	chr11	-	Retained
TRAF6	TRAF6	NM_145803.2	Pool1	chr11	-	Retained
TRAP1	TRAP1	NM_016292.2	Pool1	chr16	-	Retained
TREM1	TREM1	NM_001242589.1	Pool1	chr6	-	Retained
TREM1	TREM1	NM_001242590.1	Pool1	chr6	-	Retained
TREM1	TREM1	NM_018643.3	Pool1	chr6	-	Retained
TREM2	TREM2	NM_018965.2	Pool1	chr6	-	Retained
TRPC2	TRPC2	NR_002720.2	Pool1	chr11	+	Retained
TRPM5	TRPM5	NM_014555.3	Pool1	chr11	-	Filtered out
TRPV1	TRPV1	NM_018727.5	Pool1	chr17	-	Retained
TRPV1	TRPV1	NM_080704.3	Pool1	chr17	-	Retained
TRPV1	TRPV1	NM_080705.3	Pool1	chr17	-	Retained
TRPV1	TRPV1	NM_080706.3	Pool1	chr17	-	Retained
TSLP	TSLP	NM_033035.4	Pool1	chr5	+	Retained
TSLP	TSLP	NM_138551.4	Pool1	chr5	+	Retained
TSLP	TSLP	NR_045089.1	Pool1	chr5	+	Retained
TWIST1	TWIST1	NM_000474.3	Pool1	chr7	-	Retained
TXLNA	TXLNA	NM_175852.3	Pool1	chr1	+	Retained
TYK2	TYK2	NM_003331.4	Pool1	chr19	-	Retained
TYMP	TYMP	NM_001113755.2	Pool1	chr22	-	Retained
TYMP	TYMP	NM_001113756.2	Pool1	chr22	-	Retained
TYMP	TYMP	NM_001257988.1	Pool1	chr22	-	Retained
TYMP	TYMP	NM_001257989.1	Pool1	chr22	-	Retained
TYMP	TYMP	NM_001953.4	Pool1	chr22	-	Retained
UBE2D2	UBE2D2	NM_003339.2	Pool1	chr5	+	Retained
UBE2D2	UBE2D2	NM_181838.1	Pool1	chr5	+	Retained
UBE2N	UBE2N	NM_003348.3	Pool1	chr12	-	Retained
VAV1	VAV1	NM_001258206.1	Pool1	chr19	+	Retained
VAV1	VAV1	NM_001258207.1	Pool1	chr19	+	Retained
VAV1	VAV1	NM_005428.3	Pool1	chr19	+	Retained
VCAM1	VCAM1	NM_001078.3	Pool1	chr1	+	Retained
VCAM1	VCAM1	NM_001199834.1	Pool1	chr1	+	Retained
VCAM1	VCAM1	NM_080682.2	Pool1	chr1	+	Retained
VCAN	VCAN	NM_001126336.2	Pool1	chr5	+	Retained
VCAN	VCAN	NM_001164097.1	Pool1	chr5	+	Retained
VCAN	VCAN	NM_001164098.1	Pool1	chr5	+	Retained
VCAN	VCAN	NM_004385.4	Pool1	chr5	+	Retained
VEGFA	VEGFA	NM_001025366.2	Pool1	chr6	+	Retained
VEGFA	VEGFA	NM_001025367.2	Pool1	chr6	+	Retained
VEGFA	VEGFA	NM_001025368.2	Pool1	chr6	+	Retained
VEGFA	VEGFA	NM_001025369.2	Pool1	chr6	+	Retained
VEGFA	VEGFA	NM_001025370.2	Pool1	chr6	+	Retained
VEGFA	VEGFA	NM_001033756.2	Pool1	chr6	+	Retained
VEGFA	VEGFA	NM_001171622.1	Pool1	chr6	+	Retained
VEGFA	VEGFA	NM_001171623.1	Pool1	chr6	+	Retained
VEGFA	VEGFA	NM_001171624.1	Pool1	chr6	+	Retained
VEGFA	VEGFA	NM_001171625.1	Pool1	chr6	+	Retained
VEGFA	VEGFA	NM_001171626.1	Pool1	chr6	+	Retained
VEGFA	VEGFA	NM_001171627.1	Pool1	chr6	+	Retained
VEGFA	VEGFA	NM_001171628.1	Pool1	chr6	+	Retained
VEGFA	VEGFA	NM_001171629.1	Pool1	chr6	+	Retained
VEGFA	VEGFA	NM_001171630.1	Pool1	chr6	+	Retained
VEGFA	VEGFA	NM_001204384.1	Pool1	chr6	+	Retained
VEGFA	VEGFA	NM_001204385.1	Pool1	chr6	+	Retained
VEGFA	VEGFA	NM_003376.5	Pool1	chr6	+	Retained
VEGFB	VEGFB	NM_001243733.1	Pool1	chr11	+	Retained
VEGFB	VEGFB	NM_003377.4	Pool1	chr11	+	Retained
VEGFC	VEGFC	NM_005429.2	Pool1	chr4	-	Retained
VIP	VIP	NM_003381.3	Pool1	chr6	+	Filtered out
VIP	VIP	NM_194435.2	Pool1	chr6	+	Filtered out
VPS45	VPS45	NM_007259.3	Pool1	chr1	+	Retained
WNT16	WNT16	NM_016087.2	Pool1	chr7	+	Filtered out
WNT16	WNT16	NM_057168.1	Pool1	chr7	+	Filtered out
XCR1	XCR1	NM_001024644.1	Pool1	chr3	-	Retained
XCR1	XCR1	NM_005283.2	Pool1	chr3	-	Retained
YWHAB	YWHAB	NM_003404.3	Pool1	chr20	+	Retained
YWHAB	YWHAB	NM_139323.2	Pool1	chr20	+	Retained
YWHAQ	YWHAQ	NM_006826.2	Pool1	chr2	-	Retained
YWHAZ	YWHAZ	NM_001135699.1	Pool1	chr8	-	Retained
YWHAZ	YWHAZ	NM_001135700.1	Pool1	chr8	-	Retained
YWHAZ	YWHAZ	NM_001135701.1	Pool1	chr8	-	Retained
YWHAZ	YWHAZ	NM_001135702.1	Pool1	chr8	-	Retained
YWHAZ	YWHAZ	NM_003406.3	Pool1	chr8	-	Retained
YWHAZ	YWHAZ	NM_145690.2	Pool1	chr8	-	Retained
ZAP70	ZAP70	NM_001079.3	Pool1	chr2	+	Retained
ZAP70	ZAP70	NM_207519.1	Pool1	chr2	+	Retained
ZFP36	ZFP36	NM_003407.3	Pool1	chr19	+	Retained
ZMYND15	ZMYND15	NM_001136046.2	Pool1	chr17	+	Retained
ZMYND15	ZMYND15	NM_001267822.1	Pool1	chr17	+	Retained
ZMYND15	ZMYND15	NM_032265.2	Pool1	chr17	+	Retained
ZNF675	ZNF675	NM_138330.2	Pool1	chr19	-	Retained

## Sheet: Sheet1
A2M
ABCB1
ABCF1
ADIPOQ
ADORA2A
ADRB1
ADRB2
AFAP1L2
AGT
AGTR1
AHSG
AIF1
AIMP1
AKT1
ALOX15
ALOX5
ALOX5AP
ANXA1
ANXA3
AOAH
AOC3
APCS
APOA1
APOA4
APOL2
AREG
ATF2
ATRN
AXL
AZU1
B4GALT1
BAD
BCL10
BCL2
BCL2A1
BCL2L1
BCL6
BDKRB1
BDKRB2
BIRC5
BLNK
BMP1
BMP10
BMP15
BMP2
BMP3
BMP4
BMP5
BMP6
BMP7
BMP8A
BMP8B
BMPR1B
BRE
BTK
C16orf5
C1QA
C1QC
C1R
C1S
C3
C3AR1
C4BPA
C4BPB
C5
C6
C7
C8A
C8B
C8G
C9
CACNA2D1
CACNB2
CACNB4
CALCA
CAMP
CASC3
CASP1
CBL
CCBP2
CCL1
CCL11
CCL13
CCL16
CCL17
CCL18
CCL19
CCL20
CCL21
CCL22
CCL24
CCL25
CCL26
CCL27
CCL28
CCL5
CCL7
CCL8
CCND1
CCND2
CCR1
CCR3
CCR4
CCR5
CCR6
CCR7
CCR8
CCR9
CCRL1
CCRL2
CD163
CD180
CD1D
CD274
CD28
CD4
CD40
CD40LG
CD44
CD46
CD55
CD69
CD74
CD80
CD86
CD97
CDK5
CDK9
CDKN1A
CDKN1B
CDO1
CEBPA
CEBPB
CEBPD
CER1
CFD
CFH
CFHR1
CFHR5
CFI
CFP
CFTR
CHRNA7
CHST4
CHUK
CISH
CKLF
CLCF1
CLU
CMKLR1
CMTM1
CMTM2
CMTM3
CMTM4
CMTM5
CMTM6
CNTFR
COL1A1
COL1A2
CR1
CR2
CREBBP
CRKL
CRLF1
CRP
CSF1
CSF2RB
CTLA4
CX3CL1
CX3CR1
CXCL10
CXCL11
CXCL13
CXCL14
CXCL2
CXCL3
CXCL5
CXCL6
CXCL9
CXCR1
CXCR4
CXCR6
CYBB
CYP26B1
CYP4F11
DARC
DDX58
DNAJC8
DOK2
DUOX1
DUOX2
EBI3
ECSIT
EDA2R
EGFR
ELANE
ELF3
ELK1
ENPP3
EP300
EPHX2
EPO
ERBB2
ERBB2IP
F2
F2R
F2RL1
F3
F8
FAM3B
FAM3D
FAS
FASLG
FCER1A
FES
FGF10
FGF12
FIGF
FLNA
FLT3LG
FN1
FOS
FOXO3
FOXP3
FPR1
FPR2
FYN
GAB1
GAB2
GAL
GATA3
GDF10
GDF11
GDF15
GDF2
GDF3
GDF5
GDF6
GDF9
GHSR
GLMN
GPI
GPR17
GPR68
GPX4
GRB2
GREM2
GRN
GSK3A
GSK3B
GUK1
HAVCR2
HBEGF
HCK
HDAC1
HDAC4
HDAC5
HDAC9
HGF
HMOX1
HRAS
HSPB2
HSPD1
HTR3A
ICAM1
ICOS
ICOSLG
IFIH1
IFNA16
IFNA2
IFNA4
IFNA5
IFNA6
IFNA7
IFNA8
IFNAR1
IFNAR2
IFNB1
IFNE
IFNGR1
IFNGR2
IFNK
IFNW1
IGFBP4
IK
IKBKB
IKBKG
IL10RA
IL10RB
IL11
IL12A
IL12B
IL12RB1
IL12RB2
IL13
IL13RA2
IL15
IL15RA
IL16
IL17B
IL17C
IL17F
IL17RA
IL17RB
IL17RC
IL17RD
IL17RE
IL18
IL18BP
IL18R1
IL18RAP
IL19
IL1A
IL1R1
IL1R2
IL1RAP
IL1RAPL2
IL1RL1
IL1RL2
IL1RN
IL20
IL21
IL21R
IL22
IL22RA1
IL22RA2
IL23A
IL23R
IL24
IL25
IL26
IL27
IL27RA
IL28A
IL29
IL2RA
IL2RB
IL2RG
IL3
IL31RA
IL32
IL33
IL3RA
IL4
IL4R
IL5
IL5RA
IL6R
IL6ST
IL7R
IL9R
INHA
INHBA
INHBB
INPP5D
INS
IPO8
IRAK1
IRAK2
IRAK3
IRAK4
IRF1
IRF3
IRF7
IRS1
IRS2
ITCH
ITGAL
ITGB1
ITGB2
ITGB6
JAK1
JAK2
JAK3
JUN
JUNB
KIT
KITLG
KLK1
KLK14
KLK15
KLKB1
KLRG1
KNG1
KRAS
KRT1
KRT7
LAMA5
LAMB1
LAMB2
LAMC1
LAMC2
LBP
LCK
LEFTY1
LEFTY2
LEP
LEPR
LIF
LILRB1
LRP8
LTA
LTA4H
LTB
LTB4R
LTBP4
LTBR
LTC4S
LTF
LY75
LY86
LYN
MALT1
MAP2K1
MAP2K2
MAP2K4
MAP2K6
MAP2K7
MAP3K1
MAP3K2
MAP3K3
MAP3K7
MAPK1
MAPK11
MAPK14
MAPK3
MAPK8
MAPK9
MAPKAPK2
MAPT
MASP1
MBL2
MC2R
MDK
MEFV
MGLL
MMP25
MMP9
MUC4
MYC
MYD88
NAMPT
NCAM1
NCOA1
NCR3
NDST1
NFAM1
NFATC3
NFATC4
NFE2L1
NFKB1
NFKBIA
NFKBIB
NFRKB
NFX1
NLK
NLRP12
NLRP3
NMI
NODAL
NOS2
NOX4
NR2F6
NR3C1
NRG1
NUP85
OLR1
ORM1
ORM2
OSM
P2RX7
PARP4
PDE4A
PDE4B
PDE4C
PDE4D
PDGFB
PELI1
PELI2
PIK3CA
PIK3CD
PIK3CG
PIK3R1
PIK3R2
PLA2G2D
PLA2G2E
PLA2G4C
PLA2G5
PLA2G7
PLCB2
PLCB3
PLCB4
PLCD1
PLCG1
PLCG2
PLP2
PPARG
PPBP
PPIA
PRDM1
PRDX5
PRG2
PRKACA
PRKCA
PRKCD
PRKCZ
PROCR
PROK2
PRTN3
PTEN
PTGES
PTGFR
PTGIS
PTGS1
PTGS2
PTK2B
PTN
PTPN11
PTPN6
PTPRC
PTX3
PXMP2
PYCARD
PYDC1
RAC1
RAF1
RAPGEF1
RBM24
RBM4
RCAN1
REG3G
REL
RELA
RETN
RHOA
RIPK2
RPS6
RPS6KA1
RPS6KB1
RPS6KB2
RYR1
S100A12
S100A8
S100A9
S100B
SAA4
SAAL1
SCGB1A1
SCGB3A1
SCUBE1
SDCBP
SECTM1
SELENBP1
SERPINA1
SERPINA3
SERPING1
SH2B2
SHC1
SHH
SIGIRR
SIGLEC1
SIVA1
SLC7A5
SLPI
SLURP1
SOCS2
SOCS3
SOCS5
SOD1
SOS1
SP1
SPN
SPRED1
SPRED2
SQSTM1
SRC
STAB1
STAT1
STAT3
STAT4
STAT5A
STAT5B
STAT6
SYK
TAB1
TAB2
TAB3
TACR1
TBXAS1
TF
TGFB1
TGFB2
TGM2
THBS1
THBS3
TIMP1
TIRAP
TLR1
TLR10
TLR2
TLR3
TLR4
TLR5
TLR6
TLR7
TNC
TNFAIP3
TNFAIP6
TNFRSF11B
TNFRSF14
TNFRSF18
TNFRSF19
TNFRSF1A
TNFRSF1B
TNFRSF25
TNFRSF4
TNFRSF9
TNFSF10
TNFSF11
TNFSF12
TNFSF13
TNFSF13B
TNFSF14
TNFSF15
TNFSF18
TNFSF4
TNFSF8
TNFSF9
TOLLIP
TP53
TPST1
TRAF3
TRAF3IP2
TRAF6
TRAP1
TREM1
TREM2
TRPV1
TSLP
TWIST1
TXLNA
TYK2
TYMP
UBE2D2
UBE2N
VAV1
VCAM1
VEGFA
VEGFB
VEGFC
VIP
VPS45
WNT16
XCR1
YWHAB
YWHAQ
YWHAZ
ZAP70
ZFP36
ZMYND15
ZNF675
ANGPT1
ANGPT2
MMP1
MMP11
MMP12
MMP13
MMP14
MMP15
MMP3
PDGFA
PDGFC
PDGFD
PDGFRA
PDGFRB
FLT1
FLT4
KDR
ACE2
TMPRSS2
CDHR3
TBP
REG1A
TMSB4X
HPGDS
TUBA1B
CHGA
TFF3
SPINK4
DEFA6
DEFA5
OLFM4
SPINK1
KRT5
SERPINB3
AQP3
AZGP1
LYPD2
CRABP1
SOX11
DLX1
ARX
ADCY3
OMP
DCX
GAP43
TRPC2
CDHR1
NEUROD1
HES6
HEMGN
ERMAP
CD79A
CD3G
RORA
CCR2
NAPSA
MRC1
IBSP
MMP2
COL2A1
MYL9
MYH11
PODXL
PECAM1
FRZB
NPY
BCAN
GRIA2
PLP1
MAG
ASCL3
CCK
PGLYRP1
BPIFB1
BPIFA1
FOXJ1
KRT17
TP63
TRPM5
MUC2
CYP2G1P
MSLN
DCLK1
SCGB1C1
BPIFB4
FURIN
OBP2B
OBP2A
BARX2
CXCL17
MUC5
CALR
CPA3
GATA2
FCGR3B
CXCR2
VCAN
EREG
CD300E
JARID2
C1QB
MARCO
FABP4
MSR1
SPP1
APOE
HIST1H4C
CD2
MKI67
MGP
DCN
COL3A1
CLDN5
SELE
PIFO
CAPS
AGER
KRT19
SFTPA2
SFTPB
CSF3
CSF2
CCL3
IL6
IFNG
TNF-alpha
AAK1
BIKe
GAK
IL-1B
IL-2
IL7
IL8
IL9
IL10
IL17
IFN-ALPHA
IP10-R
MCP1
CCL4
TIMP2
